# Supplementary material for: Identification and Functional Verification of the Glycosyltransferase Gene Family Involved in Flavonoid Synthesis in Rubus chingii Hu
Source: MDPI journal article supplement (doi:10.3390/plants13101390), 2024-05-16
Supplement: s1 [file s1]

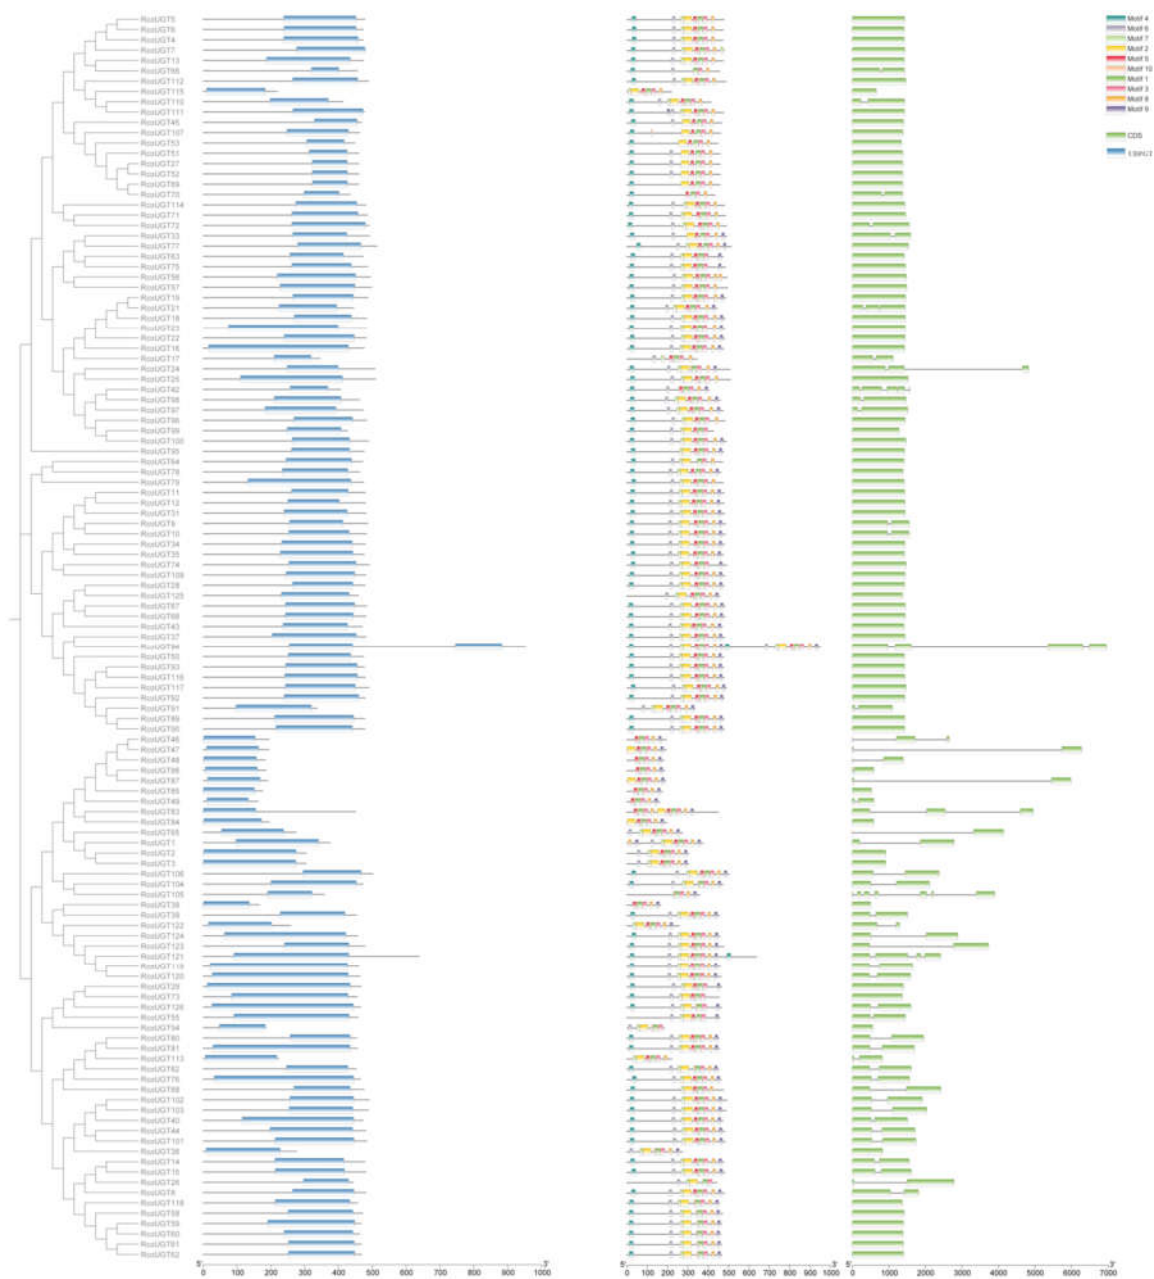

Figure S1 Phylogenetic tree, conserved protein structure, conserved motif and gene structure analysis of *RcoUGTs*.

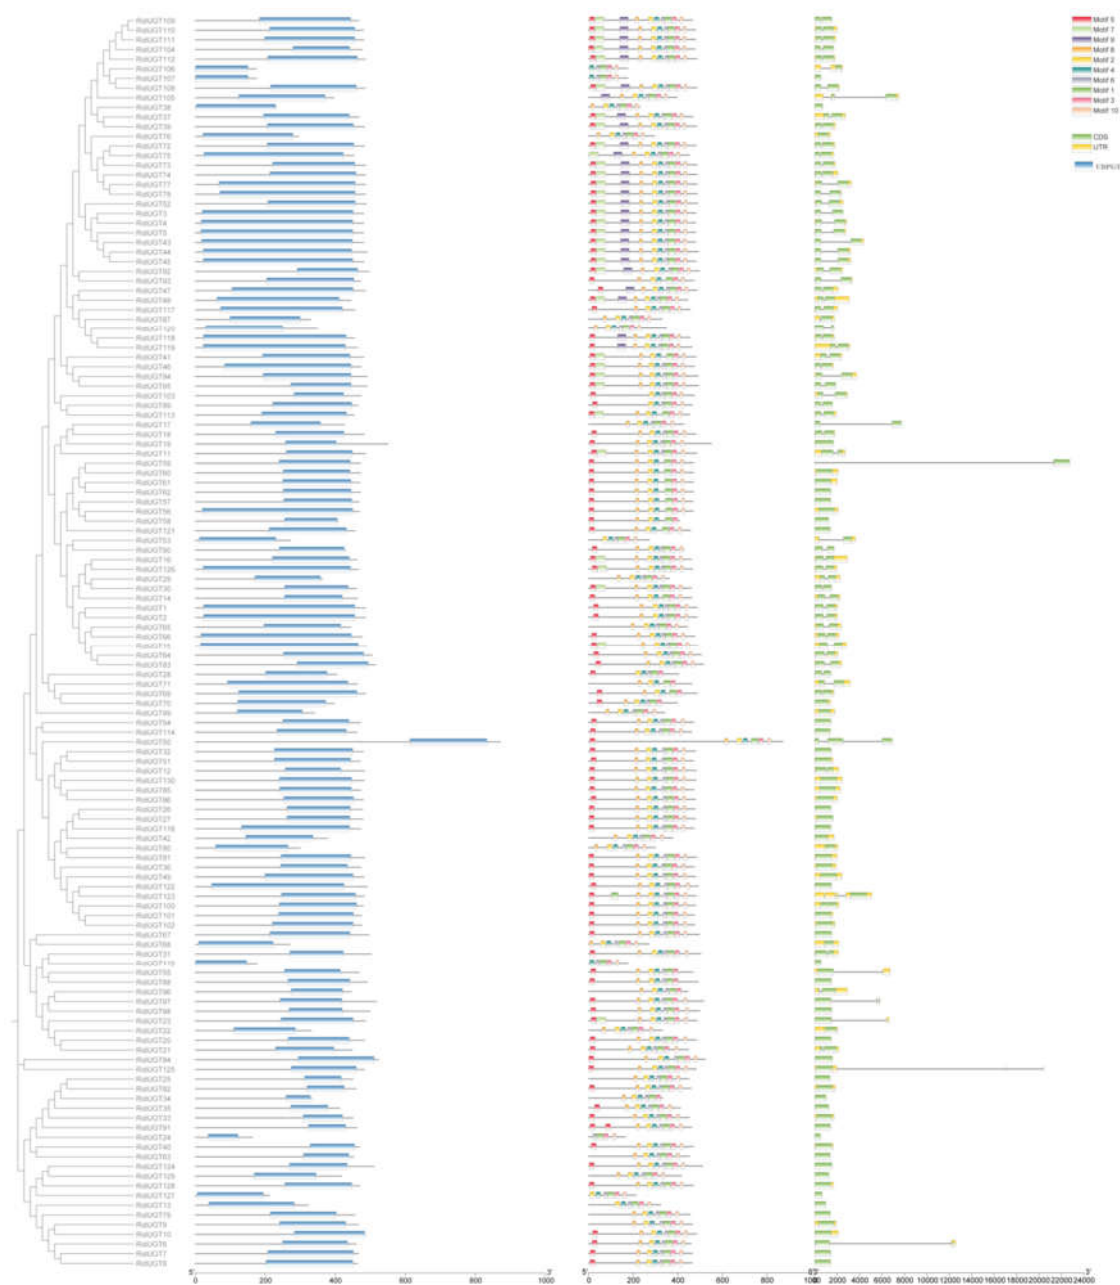

Figure S2 Phylogenetic tree, conserved protein structure, conserved motif and gene structure analysis of *RidUGTs*.

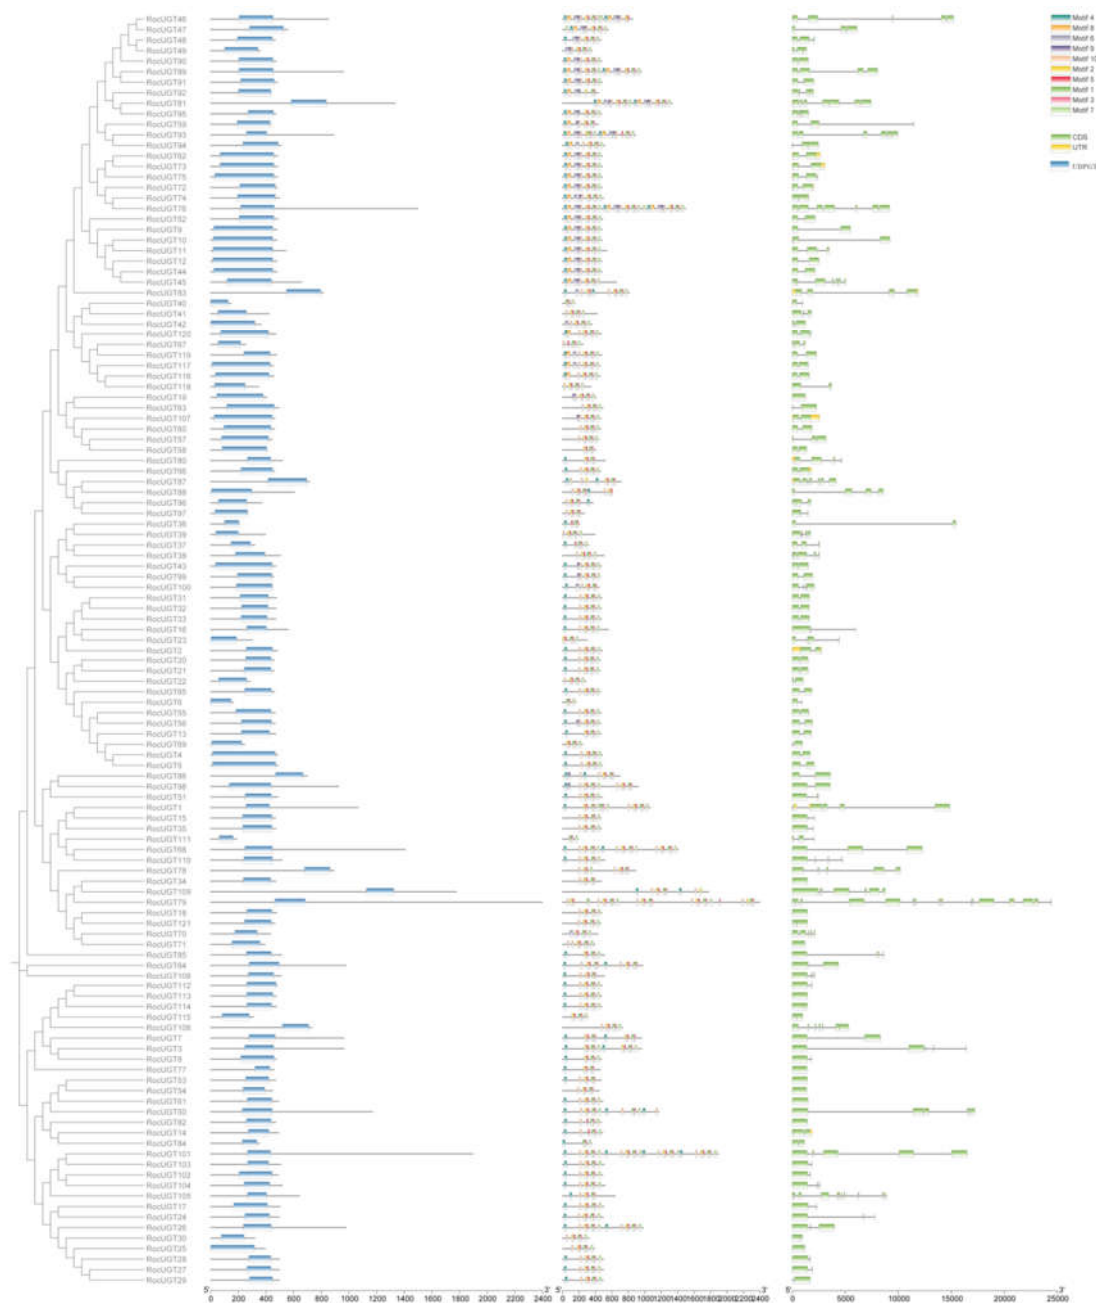

Figure S3 Phylogenetic tree, conserved protein structure, conserved motif and gene structure analysis of *RocUGTs*.

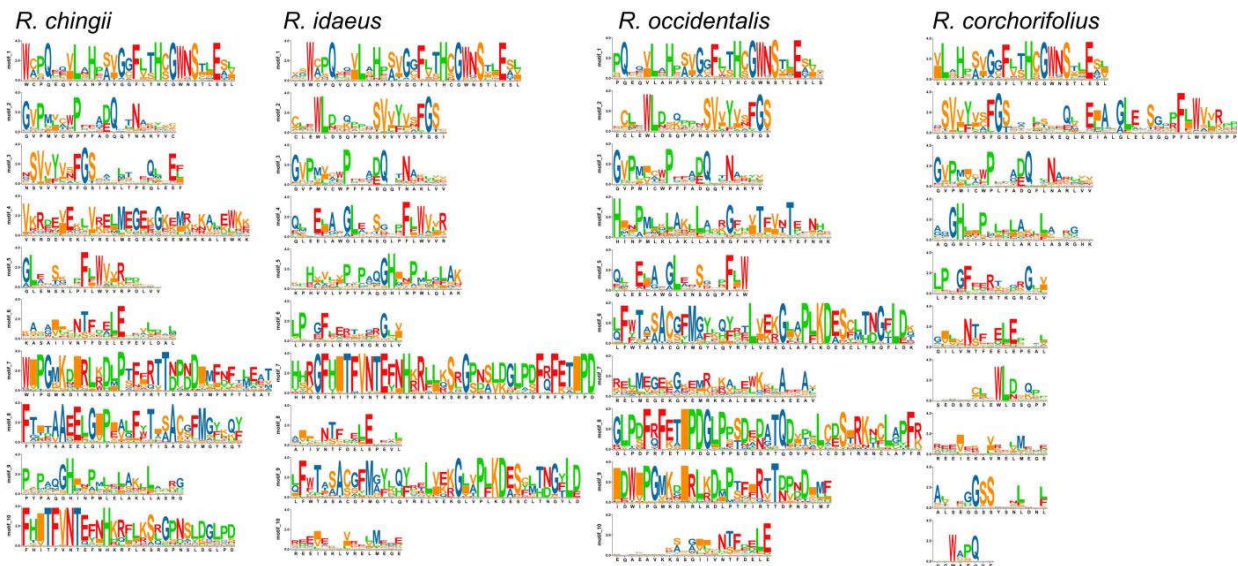

Figure S4 SeqLogo of the Motif 1 to 10 among four plants of *Rubus*.

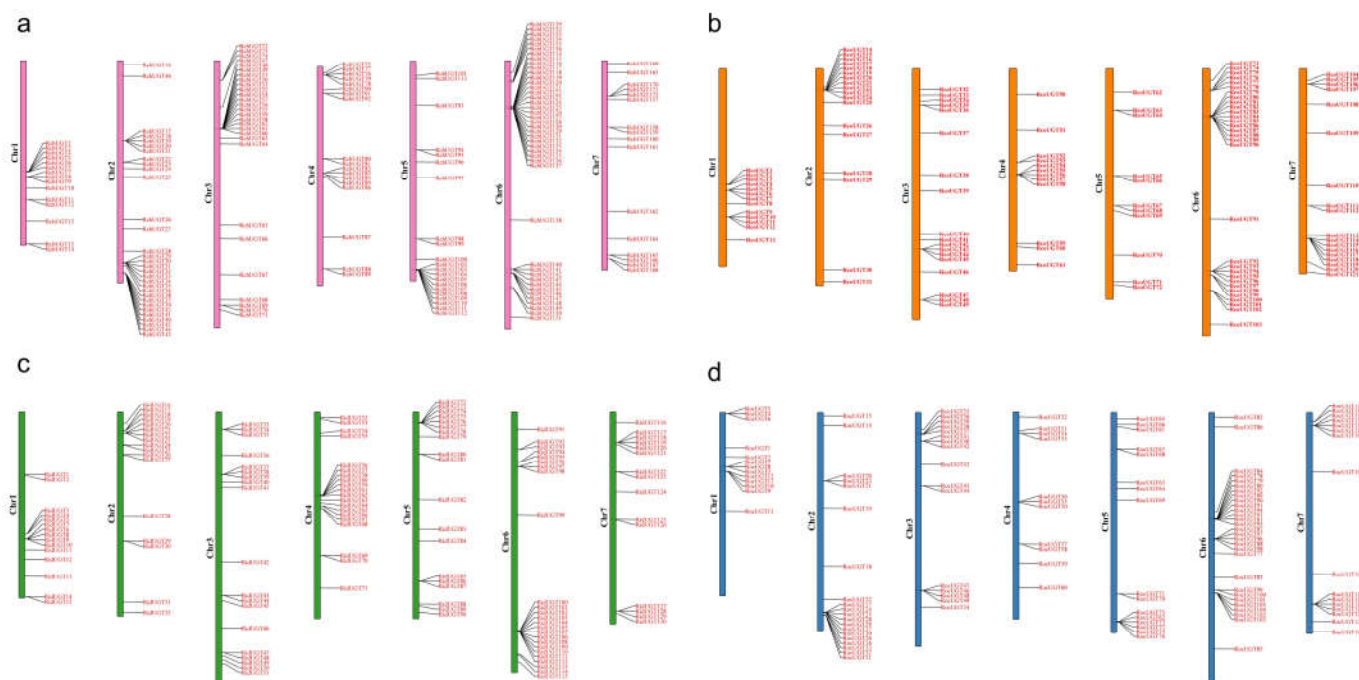

Figure S5 Chromosome Mapping of *UGTs* Gene in four *Rubus* species.

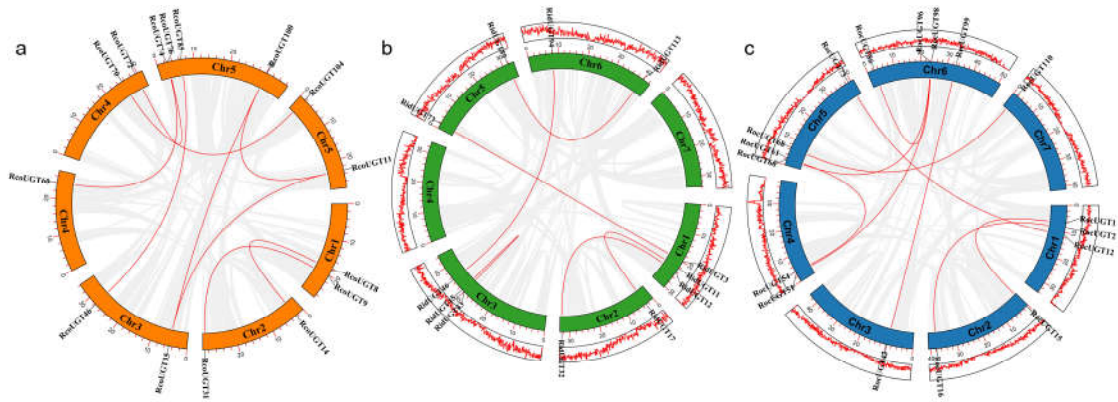

Figure S6 Collinear analysis of *UGTs* gene family from *R. corchorifolius* (a), *R. idaeus* (b) and *R. occidentalis* (c).

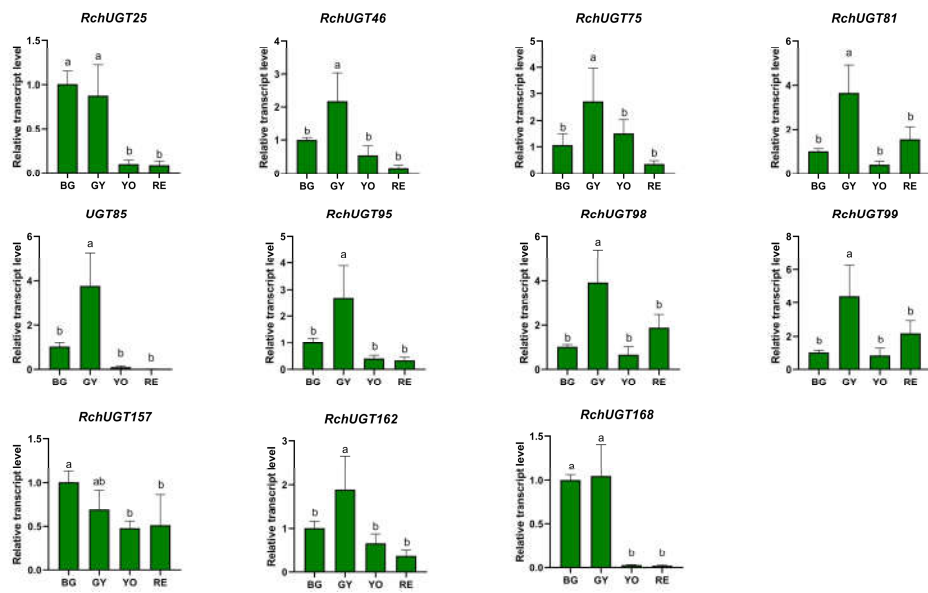

Figure S7 RT-qPCR results of *RchUGTs* in four stages of fruits development. BG (big green, 21 DPA), GY (green-to-yellow, 42 DPA), YO (yellow-to-orange, 48 DAP) and RE (red, 54 DPA).

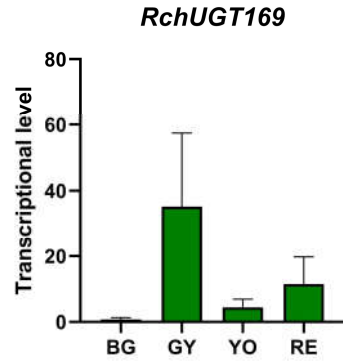

Figure S8 The expression patterns of *RchUGT169* in four stages of fruits development.

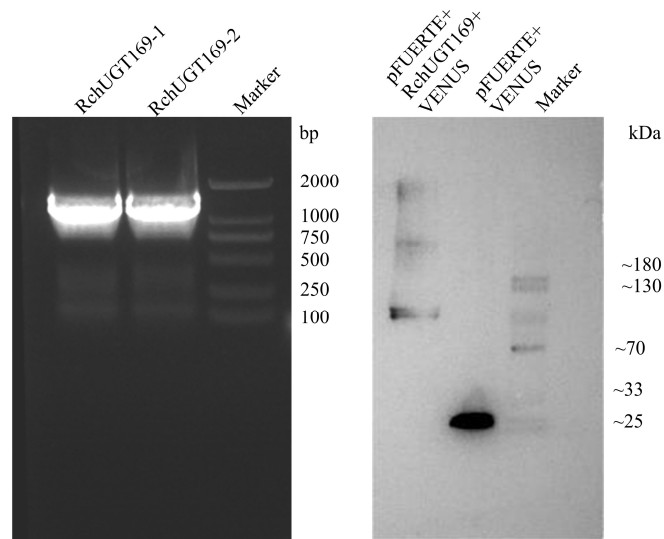

Figure S9 Full-length CDS cloning of *RchUGT169* gene of raspberry and SDS-PAGE of RchUGT169 recombinant protein.
