# Supplementary material for: Identification and Functional Verification of the Glycosyltransferase Gene Family Involved in Flavonoid Synthesis in Rubus chingii Hu
Source: Plants (Basel). 2024 May 16;13(10):1390. doi: 10.3390/plants13101390 (PMC11125054; doi:10.3390/plants13101390)
Supplement: Supplementary file 1 [file plants-13-01390-s001.zip › Supplementary files (Table S1-7).xlsx]

## Sheet: Table S1
Table S1 Physical and chemical properties of proteins encoded by UGT of four Rubus
Species	Sequence ID	Gene Name	Number of Amino Acid (aa)	Molecular Weight (kDa)	Theoretical isoelectric point (PI)	Instability Index	Aliphatic Index	Grand Average of Hydropathicity	Subcellular localization
R. chingii	LG01.1780	RchUGT1	352	39.6802	4.99	39.34	78.92	-0.213	Cytosol
	LG01.1781	RchUGT2	479	53.5992	5.38	41.95	80.15	-0.209	Cytosol
	LG01.1783	RchUGT3	480	54.1701	5.46	43.26	83.81	-0.195	Chloroplast
	LG01.1784	RchUGT4	452	51.2797	5.35	43.77	84.91	-0.211	Peroxisome
	LG01.1785	RchUGT5	480	54.3693	5.64	44.89	82.4	-0.227	Chloroplast
	LG01.1786	RchUGT6	452	51.4509	5.44	45.92	83.41	-0.241	Chloroplast
	LG01.1899	RchUGT7	465	52.6338	6.4	46.9	94.92	-0.192	Chloroplast; Vacuole; Endoplasmic reticulum
	LG01.1902	RchUGT8	473	53.456	5.12	46.38	89.85	-0.227	Cytosol
	LG01.1904	RchUGT9	379	42.7993	5.97	50.69	92.4	-0.148	Chloroplast
	LG01.2143	RchUGT10	478	53.5226	5.75	40.25	90.13	-0.151	Cytosol
	LG01.2404	RchUGT11	477	52.4765	5.18	42.96	93.94	-0.017	Chloroplast
	LG01.2406	RchUGT12	479	52.3998	5.85	42.1	95.09	-0.015	Chloroplast; Endoplasmic reticulum
	LG01.2952	RchUGT13	473	53.4506	5.6	43.65	95.01	-0.08	Chloroplast
	LG01.3564	RchUGT14	460	51.1475	5.63	42.22	89.87	-0.107	Chloroplast
	LG01.3565	RchUGT15	410	45.6974	5.43	40.54	89.88	-0.121	Chloroplast
	LG02.116	RchUGT16	479	53.179	5.55	46.12	94.78	-0.063	Cytosol
	LG02.2191	RchUGT17	264	30.2353	4.72	34.75	79.02	-0.377	Cytosol
	LG02.2192	RchUGT18	280	31.9463	4.73	38.57	76.93	-0.35	Chloroplast
	LG02.2193	RchUGT19	453	51.3236	4.99	42.5	82.6	-0.25	Chloroplast
	LG02.2194	RchUGT20	456	51.698	4.95	42.28	82.06	-0.259	Chloroplast
	LG02.2195	RchUGT21	458	51.9583	4.92	42.14	81.7	-0.262	Chloroplast
	LG02.2651	RchUGT22	444	48.8405	5.92	44.07	96.87	-0.117	Cytosol
	LG02.2654	RchUGT23	447	49.181	6.19	43.66	97.09	-0.107	Cytosol
	LG02.2782	RchUGT24	478	51.9927	5.55	35.15	94.25	0.034	Cytosol
	LG02.2918	RchUGT25	481	53.0623	5.83	43.15	94.3	-0.134	Chloroplast
	LG02.3339	RchUGT26	475	51.8406	5.46	44.23	101.2	0.115	Cytosol
	LG02.3505	RchUGT27	459	51.4174	6.58	39.83	89.61	-0.115	Chloroplast
	LG02.3921	RchUGT28	382	42.9316	4.97	45.66	87.98	-0.021	Chloroplast
	LG02.4196	RchUGT29	499	56.53	5.74	40.23	91.6	-0.179	Cytosol
	LG02.4199	RchUGT30	469	52.3276	5.75	48.97	95.2	-0.018	Chloroplast
	LG02.4204	RchUGT31	486	54.2895	6.27	45.54	90.68	-0.149	Nucleus
	LG02.4205	RchUGT32	486	54.9069	5.25	42.44	90.29	-0.186	Cytosol
	LG02.4206	RchUGT33	533	60.1913	5.51	40.63	92.35	-0.142	Nucleus
	LG02.4207	RchUGT34	484	54.6467	5.94	41.01	84.21	-0.259	Chloroplast
	LG02.4211	RchUGT35	422	47.547	6.16	35.15	93.58	0.003	Cytosol
	LG02.4273	RchUGT36	550	60.8672	5.14	40.16	87.22	-0.096	Chloroplast
	LG02.4444	RchUGT37	461	51.8693	4.98	40.84	88.52	-0.165	Cytosol
	LG02.4445	RchUGT38	225	25.4279	5.71	41.87	74.98	-0.453	Chloroplast
	LG02.4448	RchUGT39	456	51.2344	5.19	36.9	86.97	-0.185	Cytosol
	LG02.4449	RchUGT40	311	35.089	4.93	43.37	84.89	-0.257	Chloroplast
	LG02.4450	RchUGT41	310	34.9608	4.88	43.75	85.16	-0.245	Chloroplast
	LG02.4451	RchUGT42	274	30.9473	5.15	39.08	83.54	-0.309	Chloroplast
	LG02.4452	RchUGT43	456	52.1094	5.12	43.17	83.53	-0.309	Cytosol
	LG02.4453	RchUGT44	391	44.843	5.2	42.79	83.2	-0.416	Cytosol
	LG02.4454	RchUGT45	327	37.2913	4.83	45.27	82.81	-0.328	Cytosol
	LG02.460	RchUGT46	688	76.0317	9.54	55.86	81.15	-0.322	Chloroplast
	LG03.1225	RchUGT47	474	52.987	5.18	42.71	96.65	0.042	Cytosol
	LG03.1773	RchUGT48	208	23.2877	5.31	37.74	88.94	-0.179	Cytosol
	LG03.1774	RchUGT49	469	51.9537	5.69	42.36	89.15	-0.084	Chloroplast
	LG03.1775	RchUGT50	453	50.3008	5.87	43.19	88.21	-0.104	Cytosol
	LG03.1776	RchUGT51	358	39.7338	5.08	40.71	92.01	-0.041	Chloroplast
	LG03.1778	RchUGT52	488	54.4217	5.75	44.4	90.29	-0.053	Chloroplast
	LG03.1779	RchUGT53	357	39.9481	5.29	40.99	91.74	-0.046	Chloroplast
	LG03.1780	RchUGT54	473	52.8978	5.45	43.53	91.75	-0.105	Chloroplast
	LG03.1781	RchUGT55	481	53.9281	5.68	43.89	92.45	-0.11	Chloroplast
	LG03.1782	RchUGT56	408	45.6925	4.93	43.62	94.39	-0.085	Chloroplast
	LG03.1783	RchUGT57	358	40.2933	5.04	42.18	91.51	-0.141	Chloroplast
	LG03.1784	RchUGT58	478	53.2882	5.79	44.85	87.51	-0.135	Chloroplast
	LG03.1785	RchUGT59	464	51.7485	5.98	45.15	88.06	-0.138	Chloroplast
	LG03.1786	RchUGT60	454	50.7542	5.36	43.02	88.68	-0.13	Chloroplast
	LG03.1787	RchUGT61	405	45.0336	4.95	44.49	88.57	-0.112	Peroxisome
	LG03.1788	RchUGT62	355	39.7736	4.95	44.57	88.14	-0.137	Cytosol
	LG03.1998	RchUGT63	469	52.4801	5.91	41.19	91.04	-0.001	Cytosol
	LG03.2108	RchUGT64	481	54.1789	5.66	40.05	91.66	-0.137	Extracellular
	LG03.3373	RchUGT65	350	39.231	5.29	42.96	94.97	-0.169	Cytosol
	LG03.3569	RchUGT66	384	43.3688	5.97	41.37	81.22	-0.247	Nucleus
	LG03.4144	RchUGT67	461	51.6284	6.78	29.82	91.11	-0.071	Cytosol
	LG03.4688	RchUGT68	481	52.5171	5.54	47.87	95.41	-0.036	Plasma membrane
	LG03.4806	RchUGT69	285	32.492	5.8	48.02	81.02	-0.264	Chloroplast
	LG03.4807	RchUGT70	346	38.5096	6.56	40.43	88.67	-0.037	Cytosol
	LG03.4917	RchUGT71	475	51.8569	5.36	38.35	100.06	0.103	Cytosol
	LG03.569	RchUGT72	448	50.1901	6.71	45.39	95.27	0.001	Chloroplast
	LG03.570	RchUGT73	459	51.5726	6.13	39.74	91.92	-0.097	Chloroplast
	LG03.571	RchUGT74	459	51.292	5.63	44.21	86.41	-0.12	Chloroplast
	LG04.150	RchUGT75	355	40.0755	5	41.65	76.37	-0.295	Cytosol
	LG04.211	RchUGT76	466	51.6904	6.21	36.12	86.39	-0.155	Cytosol
	LG04.212	RchUGT77	293	32.8628	6.08	26.13	82.18	-0.318	Cytosol
	LG04.213	RchUGT78	457	50.7413	5.78	33.98	90.46	-0.124	Chloroplast
	LG04.214	RchUGT79	280	31.3212	5.83	27.44	88.46	-0.219	Chloroplast
	LG04.2298	RchUGT80	124	13.6224	4.68	45.77	90.24	-0.173	Chloroplast
	LG04.2301	RchUGT81	368	40.6285	5.06	41.3	94.38	-0.024	Chloroplast
	LG04.2531	RchUGT82	443	49.542	7.21	39.76	83.12	-0.245	Cytosol
	LG04.2535	RchUGT83	299	33.7891	5.69	42.52	90.87	-0.199	Cytosol
	LG04.2567	RchUGT84	463	51.9449	7.13	42.17	86.09	-0.179	Cytosol
	LG04.2568	RchUGT85	434	48.7433	7.62	39.67	85.32	-0.18	Cytosol
	LG04.2614	RchUGT86	543	61.4594	8.36	50.84	89.06	-0.138	Cytosol
	LG04.3361	RchUGT87	463	50.0033	6.25	38.82	84.92	-0.023	Chloroplast
	LG04.3957	RchUGT88	492	54.9303	6.09	54.34	93.92	0.021	Chloroplast
	LG04.3958	RchUGT89	442	48.9846	6.85	46.13	92.85	-0.068	Chloroplast
	LG04.612	RchUGT90	471	51.9421	5.94	39	105.92	0.11	Chloroplast
	LG04.742	RchUGT91	472	51.3661	6.14	28.36	101.4	0.052	Chloroplast
	LG04.743	RchUGT92	472	51.1026	6.16	29.67	100.17	0.036	Chloroplast
	LG05.1154	RchUGT93	479	52.5355	5.98	37.08	95.99	-0.033	Vacuole; Endoplasmic reticulum
	LG05.2170	RchUGT94	379	41.7302	6.03	45.03	73.85	-0.53	Cytosol
	LG05.2171	RchUGT95	485	53.6737	8.97	50.63	85.79	-0.268	Nucleus
	LG05.2375	RchUGT96	150	17.3384	8.34	42.25	81.27	-0.218	Chloroplast
	LG05.2662	RchUGT97	367	40.76	5.62	41.79	89.16	-0.109	Cytosol
	LG05.3444	RchUGT98	481	53.5785	6.41	52.21	86.59	-0.108	Chloroplast
	LG05.3446	RchUGT99	452	50.0684	5.77	45.58	89.98	-0.04	Chloroplast
	LG05.3832	RchUGT100	445	50.0804	5.32	46.97	93.06	-0.138	Cytosol
	LG05.389	RchUGT101	255	28.4485	6.37	44.71	82.55	-0.18	Cytosol
	LG05.4049	RchUGT102	480	53.6687	5.6	39.9	89.17	-0.164	Chloroplast
	LG05.4050	RchUGT103	410	45.7314	4.93	40.49	90.59	-0.121	Chloroplast
	LG05.4051	RchUGT104	358	40.2993	4.89	37.89	93.13	-0.089	Cytosol
	LG05.4058	RchUGT105	358	40.3883	4.8	37.99	90.67	-0.116	Cytosol
	LG05.4059	RchUGT106	410	45.8735	4.85	41.31	90.1	-0.128	Chloroplast; Nucleuseus; Peroxisome
	LG05.4060	RchUGT107	480	53.8088	5.49	40.97	88.96	-0.166	Chloroplast
	LG05.4061	RchUGT108	486	54.4405	5.43	40.59	88.66	-0.169	Cytosol
	LG05.4062	RchUGT109	474	53.1261	5.57	42.32	89.05	-0.16	Cytosol
	LG05.4066	RchUGT110	482	53.7668	5.27	45.42	94.67	-0.077	Chloroplast
	LG05.4067	RchUGT111	468	52.212	5.41	47.63	93.76	-0.09	Chloroplast
	LG05.4068	RchUGT112	357	40.085	4.68	41.21	97.76	0.006	Cytosol
	LG05.460	RchUGT113	485	53.6075	5.98	36.49	97.84	-0.036	Chloroplast
	LG06.1224	RchUGT114	408	45.1743	5.05	37.43	95.78	0.029	Cell membrane; Chloroplast; Plasma membranem. Nucleuseus; Peroxisome
	LG06.1225	RchUGT115	482	53.7333	5.7	39.24	95.23	0.003	Chloroplast
	LG06.1226	RchUGT116	461	51.6084	5.37	39.15	94.73	-0.029	Chloroplast
	LG06.1227	RchUGT117	486	54.2126	5.72	40.82	95.68	-0.009	Chloroplast
	LG06.1228	RchUGT118	447	50.5045	5.81	36.13	93.33	0.016	Chloroplast
	LG06.1234	RchUGT119	356	39.7596	4.76	43.61	85.98	-0.09	Chloroplast
	LG06.1235	RchUGT120	459	51.1337	4.83	42.11	88.15	-0.093	Chloroplast
	LG06.1236	RchUGT121	485	53.9379	5	44.38	87.26	-0.103	Chloroplast
	LG06.1237	RchUGT122	356	40.0222	5.15	41.83	89.27	-0.049	Cytosol
	LG06.1238	RchUGT123	455	51.0049	5.35	41.5	90.64	-0.049	Chloroplast
	LG06.1239	RchUGT124	476	53.2456	5.58	42.77	90.34	-0.043	Chloroplast
	LG06.1240	RchUGT125	430	47.8165	5.98	45.03	92.07	-0.02	Chloroplast
	LG06.1241	RchUGT126	496	55.4313	5.45	41.9	97.28	-0.061	Chloroplast
	LG06.1242	RchUGT127	390	43.5121	5.12	33.8	89	-0.032	Cytosol
	LG06.1243	RchUGT128	476	53.2172	5.4	36.06	89.31	-0.062	Chloroplast
	LG06.1244	RchUGT129	480	53.7692	5.89	37.17	87.75	-0.094	Cytosol
	LG06.1245	RchUGT130	357	40.0213	5.63	37.45	87.39	-0.043	Cytosol
	LG06.1275	RchUGT131	477	53.0455	5.36	40.9	93.17	-0.112	Cytosol
	LG06.1276	RchUGT132	449	49.7351	5.6	40.87	92.03	-0.036	Cytosol
	LG06.1277	RchUGT133	475	52.7382	5.15	44.12	89.87	-0.097	Chloroplast
	LG06.1278	RchUGT134	478	52.9116	4.92	45.04	95.02	-0.028	Chloroplast
	LG06.1279	RchUGT135	455	50.8144	5.73	48.04	89.56	-0.128	Chloroplast
	LG06.1281	RchUGT136	481	53.8979	5.56	48.87	90.54	-0.055	Chloroplast
	LG06.1284	RchUGT137	362	40.6402	4.95	43.87	86.93	-0.112	Chloroplast
	LG06.3172	RchUGT138	475	53.554	6.13	43.86	85.12	-0.307	Chloroplast
	LG06.321	RchUGT139	487	54.5703	5.7	46.05	83.8	-0.217	Chloroplast
	LG06.4016	RchUGT140	482	54.444	6.09	49.78	90.98	-0.209	Extracellular
	LG06.4018	RchUGT141	313	34.9646	6.07	41.21	98.98	-0.112	Cytosol
	LG06.4021	RchUGT142	410	46.3828	5.7	43.41	93.44	-0.082	Chloroplast
	LG06.4022	RchUGT143	489	54.8316	5.43	42.44	93.35	-0.081	Cytosol; Plasma membrane
	LG06.4094	RchUGT144	482	54.4425	5.88	39.16	94.63	-0.107	Extracellular
	LG06.4098	RchUGT145	726	81.3115	6.02	38.03	89.39	-0.128	Nucleus
	LG06.4099	RchUGT146	193	21.8391	5.7	38.38	97.88	-0.241	Nucleus
	LG06.4100	RchUGT147	491	55.3112	5.83	38.51	95.23	-0.106	Chloroplast
	LG06.4101	RchUGT148	488	55.04	5.99	41.03	94.47	-0.148	Cytosol
	LG06.4454	RchUGT149	462	52.0317	5.62	46.32	95.61	-0.069	Cytosol
	LG06.4457	RchUGT150	501	55.9012	5.88	45.69	94.41	-0.032	Chloroplast
	LG06.5198	RchUGT151	450	50.5855	6.17	49.6	90.11	-0.122	Chloroplast
	LG06.556	RchUGT152	462	51.1988	5.6	48.23	96.86	-0.061	Cytosol
	LG06.557	RchUGT153	448	49.1653	6.52	43.14	92.28	-0.083	Chloroplast
	LG06.596	RchUGT154	454	50.7212	5.66	43.8	90.64	-0.127	Extracellular
	LG06.597	RchUGT155	409	45.9168	4.96	33.41	89.9	-0.133	Cytosol
	LG06.598	RchUGT156	452	50.5928	5.81	36.24	95.8	-0.006	Chloroplast; Nucleus; Extracellular; Vacuole; Endoplasmic reticulum; Golgi apparatus
	LG07.1014	RchUGT157	947	103.661	6.07	56.45	81.45	-0.248	Plasma membrane
	LG07.1697	RchUGT158	533	60.4252	6.49	58.42	81.58	-0.305	Chloroplast
	LG07.1698	RchUGT159	478	53.1607	5.25	44.29	87.49	-0.137	Cytosol
	LG07.1907	RchUGT160	154	17.0725	6.51	53.04	89.22	-0.108	Chloroplast
	LG07.2066	RchUGT161	323	36.4017	5.69	52.05	90.5	-0.066	Chloroplast
	LG07.2926	RchUGT162	480	51.938	5.67	49.83	72.77	-0.277	Chloroplast
	LG07.297	RchUGT163	475	51.8064	5.62	48.52	93.16	0.002	Chloroplast; Nucleus
	LG07.3505	RchUGT164	229	26.1489	6.58	41.78	79.21	-0.18	Chloroplast
	LG07.3915	RchUGT165	517	56.5724	6.71	43.87	92.22	-0.006	Chloroplast
	LG07.3917	RchUGT166	476	52.6435	5.98	40.71	90.97	-0.019	Chloroplast
	LG07.4008	RchUGT167	488	53.6991	5.79	46.07	94.65	-0.016	Nucleus; Cytosol
	LG07.4009	RchUGT168	465	51.6175	6.1	40.08	92.84	-0.12	Cytosol
	LG07.63	RchUGT169	454	49.2888	6.15	35.32	94.69	0.088	Chloroplast
	LG07.942	RchUGT170	701	78.6428	6.35	48.9	97.5	-0.001	Nucleus
	LG07.943	RchUGT171	463	52.2375	8.27	46.42	96.03	-0.068	Mitochondrion
	LG07.944	RchUGT172	459	51.7028	6.74	45.83	98.82	-0.035	Chloroplast
R. corchorifolius	Rf010014000	RcoUGT1	374	42.3898	4.65	42.93	75.83	-0.386	Cytoskeleton
	Rf010014010	RcoUGT2	304	34.9291	6.08	39.54	86.55	-0.319	Cytosol
	Rf010014030	RcoUGT3	304	34.8508	5	48.09	82.66	-0.272	Cytosol
	Rf010015090	RcoUGT4	473	53.5838	6.22	40.1	94.14	-0.211	Chloroplast; Endoplasmic reticulum
	Rf010015100	RcoUGT5	477	53.9657	5.35	47.35	92.56	-0.189	Cytosol; Endoplasmic reticulum
	Rf010015110	RcoUGT6	473	53.351	5.17	46.38	90.27	-0.228	Chloroplast; Cytosol
	Rf010015130	RcoUGT7	479	54.3221	5.56	49.31	89.96	-0.261	Chloroplast
	Rf010017650	RcoUGT8	480	53.6174	5.61	42.37	89.35	-0.174	Cytosol
	Rf010020200	RcoUGT9	485	53.5829	5.43	38.32	92.19	-0.045	Chloroplast
	Rf010020210	RcoUGT10	483	53.1204	5.57	42.56	93.58	-0.039	Chloroplast
	Rf010020220	RcoUGT11	478	52.4747	5.31	44.08	92.97	-0.027	Chloroplast
	Rf010020240	RcoUGT12	479	52.5339	5.89	47.22	93.67	-0.032	Chloroplast
	Rf010025790	RcoUGT13	473	53.4835	5.58	43.47	95.03	-0.08	Cytosol
	Rf020035810	RcoUGT14	477	52.6316	5.45	39.27	93.77	-0.042	Chloroplast
	Rf020035830	RcoUGT15	481	53.0074	5.76	37.4	93.78	0.003	Cytosol
	Rf020036250	RcoUGT16	476	53.3513	6.12	38.91	87.5	-0.119	Cytosol
	Rf020036260	RcoUGT17	345	38.9625	5.78	39.05	86.17	-0.189	Cytosol
	Rf020036270	RcoUGT18	483	54.5737	6.02	43.06	84.8	-0.258	Chloroplast
	Rf020036300	RcoUGT19	486	54.8277	5.39	41.61	89.3	-0.192	Extracellular
	Rf020036330	RcoUGT20	444	49.598	5.49	42.64	89.37	-0.107	Chloroplast
	Rf020036340	RcoUGT21	481	53.6775	5.79	45.18	87.13	-0.215	Chloroplast
	Rf020036360	RcoUGT22	482	54.0425	5.46	47.58	94.05	-0.02	Chloroplast
	Rf020036370	RcoUGT23	507	56.8427	7.65	39.8	80.36	-0.384	Nucleus
	Rf020036380	RcoUGT24	509	57.4412	5.73	38.71	93.83	-0.101	Cytosol
	Rf020038400	RcoUGT25	443	50.2781	6.29	46.82	82.28	-0.21	Mitochondrion
	Rf020041980	RcoUGT26	459	51.2572	6.22	40.44	90.04	-0.109	Chloroplast
	Rf020042950	RcoUGT27	477	52.0728	5.7	40.22	102.2	0.106	Cytosol
	Rf020046400	RcoUGT28	466	50.6884	5.69	34.66	96.87	0.069	Chloroplast
	Rf020047300	RcoUGT29	481	53.0042	5.83	43.32	94.3	-0.127	Chloroplast
	Rf020066890	RcoUGT30	491	53.9091	6.09	38.13	97.86	0.028	Chloroplast
	Rf020070020	RcoUGT31	479	53.2281	5.55	45.98	94.78	-0.058	Cytosol
	Rf030074990	RcoUGT32	475	51.9942	5.36	41.03	101.31	0.115	Cytosol
	Rf030076160	RcoUGT33	275	30.4691	5.72	38.24	92.84	0.003	Cytosol
	Rf030077100	RcoUGT34	481	52.4511	5.54	47.88	96.01	0	Plasma membrane
	Rf030077930	RcoUGT35	166	18.6562	5.07	35.56	86.27	-0.319	Chloroplast
	Rf030077950	RcoUGT36	453	50.5804	6.41	44.82	93.42	-0.026	Chloroplast
	Rf030082650	RcoUGT37	473	53.0331	6.65	29.71	92.09	-0.033	Cytosol
	Rf030087550	RcoUGT38	405	45.3911	5.29	50.17	96.54	-0.204	Cytosol
	Rf030089230	RcoUGT39	470	52.1808	5.52	44.37	91.21	-0.05	Nucleus
	Rf030095790	RcoUGT40	481	54.1778	5.53	40.14	92.06	-0.136	Extracellular
	Rf030096740	RcoUGT41	467	52.1316	5.83	40.58	90.81	-0.012	Cytosol
	Rf030098520	RcoUGT42	194	21.7318	5.52	41.65	78.4	-0.326	Cytosol
	Rf030098530	RcoUGT43	194	21.912	5.45	41.6	83.87	-0.322	Chloroplast
	Rf030098540	RcoUGT44	183	20.6667	5.44	36.45	87.81	-0.25	Nucleus
	Rf030098550	RcoUGT45	162	18.3189	5.25	36.35	80.06	-0.383	Extracellular
	Rf030102230	RcoUGT46	474	52.9069	5.18	42.23	96.43	0.042	Cytosol
	Rf030108010	RcoUGT47	459	51.3491	5.65	45.35	86.84	-0.121	Chloroplast
	Rf030108020	RcoUGT48	459	51.5787	6.13	41.89	93.62	-0.093	Chloroplast
	Rf030108030	RcoUGT49	448	50.2441	6.44	45.45	96.36	-0.01	Chloroplast
	Rf040115520	RcoUGT50	185	20.209	4.94	44.81	81.68	-0.069	Chloroplast
	Rf040121080	RcoUGT51	457	50.322	5.94	45.37	94.25	-0.027	Chloroplast
	Rf040125410	RcoUGT52	493	54.5561	5.83	48.7	89.19	-0.143	Cytosol
	Rf040125430	RcoUGT53	496	55.0147	6.18	46.45	87.66	-0.148	Nucleus
	Rf040127090	RcoUGT54	471	52.6589	5.21	44.24	84.67	-0.269	Chloroplast
	Rf040127110	RcoUGT55	466	51.8972	5.23	42.6	90.58	-0.205	Chloroplast
	Rf040127120	RcoUGT56	462	51.4296	5.21	40.43	90.71	-0.193	Chloroplast
	Rf040127140	RcoUGT57	466	51.8572	5.33	42.06	92.45	-0.182	Chloroplast
	Rf040127150	RcoUGT58	467	52.1121	5.08	42.72	84.97	-0.282	Chloroplast
	Rf040140530	RcoUGT59	472	51.32	6.14	28.84	100.78	0.04	Chloroplast
	Rf040141400	RcoUGT60	471	51.7349	5.71	38.23	106.94	0.141	Chloroplast
	Rf040145530	RcoUGT61	274	30.4786	4.8	46.45	77.96	-0.14	Cytosol
	Rf050151010	RcoUGT62	455	50.6692	6.88	40.8	92.11	-0.108	Chloroplast
	Rf050153670	RcoUGT63	483	53.5895	5.69	47.31	90.25	-0.061	Chloroplast
	Rf050153680	RcoUGT64	481	53.5584	6.23	54.44	85.57	-0.131	Chloroplast
	Rf050159990	RcoUGT65	459	51.3332	5.84	45.43	91.07	-0.103	Chloroplast
	Rf050160010	RcoUGT66	434	48.4608	6.36	45.23	87.33	-0.145	Chloroplast
	Rf050164370	RcoUGT67	485	53.5475	8.86	50.13	86.21	-0.263	Nucleus
	Rf050164380	RcoUGT68	490	54.2714	6.29	43.98	75.84	-0.405	Chloroplast
	Rf050165120	RcoUGT69	455	50.0357	5.47	37.53	95.08	0.058	Chloroplast
	Rf050173450	RcoUGT70	491	53.6668	5.81	35.1	97.43	-0.014	Chloroplast
	Rf050179910	RcoUGT71	485	53.4644	5.98	38.46	98.04	-0.014	Cytosol
	Rf050180560	RcoUGT72	464	51.2296	5.77	38.99	90.99	-0.157	Nucleus
	Rf060187470	RcoUGT73	513	57.7762	5.81	46.8	84.68	-0.209	Chloroplast
	Rf060189490	RcoUGT74	462	51.2769	5.52	46.93	96.45	-0.071	Cytosol
	Rf060189500	RcoUGT75	473	51.9224	5.72	45.66	92.16	-0.047	Chloroplast
	Rf060189870	RcoUGT76	454	50.8283	5.69	43.06	89.56	-0.153	Chloroplast
	Rf060189880	RcoUGT77	455	51.1479	5.26	33.88	89.36	-0.114	Extracellular
	Rf060189890	RcoUGT78	452	50.5448	5.93	36.55	97.08	0.009	Endoplasmic reticulum
	Rf060195370	RcoUGT79	450	50.176	5.99	39.22	89.2	-0.096	Chloroplast
	Rf060195380	RcoUGT80	195	21.7042	6.43	23.67	94.92	-0.028	Chloroplast
	Rf060195410	RcoUGT81	175	19.5934	4.94	41.91	79.6	-0.26	Chloroplast
	Rf060195420	RcoUGT82	186	21.0331	5.97	42.15	75.97	-0.342	Cytosol
	Rf060195430	RcoUGT83	191	21.2845	5.44	32.02	83.19	-0.154	Chloroplast
	Rf060195570	RcoUGT84	475	53.3791	7.54	32.42	92.95	-0.064	Chloroplast
	Rf060195790	RcoUGT85	477	53.0947	5.38	40.61	94.38	-0.113	Cytosol
	Rf060195800	RcoUGT86	477	53.0586	5.49	39.67	91.13	-0.109	Cytosol
	Rf060195810	RcoUGT87	336	37.1152	5.12	39.87	90.54	-0.188	Chloroplast
	Rf060195830	RcoUGT88	478	52.9117	5.01	46.62	95.84	-0.012	Chloroplast
	Rf060195840	RcoUGT89	476	53.1168	5.26	44.02	89.5	-0.112	Chloroplast
	Rf060195860	RcoUGT90	951	106.598	5.44	47.71	90.25	-0.088	Plasma membrane
	Rf060211300	RcoUGT91	475	53.5842	6.47	42.98	84.51	-0.314	Chloroplast
	Rf060218910	RcoUGT92	482	54.418	6.09	50.31	89.96	-0.226	Extracellular
	Rf060218920	RcoUGT93	473	52.6818	5.99	36.62	97.23	-0.069	Cytosol
	Rf060218930	RcoUGT94	461	51.2214	6.05	42.79	104.01	-0.023	Cytosol
	Rf060218970	RcoUGT95	426	47.9525	5.89	44.08	90.19	-0.065	Cytosol
	Rf060218980	RcoUGT96	489	54.8717	5.51	41.73	93.95	-0.073	Cytosol
	Rf060219760	RcoUGT97	483	54.5165	5.76	39.93	91.01	-0.124	Extracellular
	Rf060219770	RcoUGT98	491	55.4896	5.92	40.54	95.23	-0.107	Chloroplast
	Rf060219780	RcoUGT99	488	55.1551	6.14	42.62	94.26	-0.16	Cytosol
	Rf060222930	RcoUGT100	472	53.127	5.58	46.31	98.11	-0.05	Cytosol
	Rf060222940	RcoUGT101	358	40.0609	6.41	37.54	92.82	-0.252	Cytosol
	Rf060222950	RcoUGT102	501	55.9183	5.91	44.24	93.63	-0.055	Chloroplast
	Rf060230540	RcoUGT103	461	51.6586	6.03	51.34	91.56	-0.127	Chloroplast
	Rf070235790	RcoUGT104	481	53.2263	6.25	41.87	92.39	-0.122	Chloroplast
	Rf070236620	RcoUGT105	413	45.8836	5.93	54.61	87.82	-0.103	Chloroplast
	Rf070236640	RcoUGT106	476	52.7866	5.98	41.7	90.76	-0.04	Chloroplast
	Rf070236660	RcoUGT107	488	54.1565	6.16	46.85	97.11	-0.02	Chloroplast
	Rf070240440	RcoUGT108	222	25.367	6.29	41.91	78.2	-0.195	Chloroplast
	Rf070244670	RcoUGT109	480	51.9962	5.6	48.71	76.02	-0.23	Chloroplast
	Rf070249910	RcoUGT110	219	24.5308	5.82	57.56	81.87	-0.321	Cytosol
	Rf070252470	RcoUGT111	478	53.1578	5.37	44.9	88.31	-0.128	Chloroplast
	Rf070252480	RcoUGT112	490	54.7859	5.42	52.59	86.14	-0.12	Cytosol
	Rf070257730	RcoUGT113	456	50.2982	5.32	48.93	90.66	-0.107	Chloroplast
	Rf070258350	RcoUGT114	459	51.6907	6.74	46.6	97.12	-0.049	Chloroplast
	Rf070258360	RcoUGT115	463	52.1945	8.42	48.31	95.62	-0.063	Mitochondrion
	Rf070258370	RcoUGT116	637	70.9292	7.87	46.25	99.34	0.028	Nucleus
	Rf070258380	RcoUGT117	258	29.3258	7.11	44.66	95.97	-0.042	Chloroplast
	Rf070258390	RcoUGT118	477	52.9141	6.07	48.62	93.4	-0.043	Chloroplast
	Rf070258400	RcoUGT119	456	51.6772	5.62	47.31	91.45	-0.077	Cytosol
	Rf070263730	RcoUGT120	458	50.0893	5.71	46.83	93.62	-0.015	Chloroplast
	Rf070265990	RcoUGT121	465	50.6684	5.97	35.77	94.95	0.09	Chloroplast
R. idaeus	Rid.01g006260.m1	RidUGT1	486	54.5635	5.31	45.57	86.21	-0.186	Nucleus
	Rid.01g006400.m1	RidUGT2	486	54.5635	5.31	45.57	86.21	-0.186	Nucleus
	Rid.01g018440.m1	RidUGT3	480	53.8897	5.34	44.01	85.65	-0.187	Chloroplast
	Rid.01g018450.m1	RidUGT4	480	53.9198	5.47	43.42	85.67	-0.17	Chloroplast
	Rid.01g018470.m1	RidUGT5	480	53.9708	5.45	47.33	84.85	-0.203	Chloroplast
	Rid.01g019860.m1	RidUGT6	459	51.4291	5.39	49.72	94.05	-0.184	Chloroplast
	Rid.01g019870.m1	RidUGT7	465	52.7356	5.5	51.96	95.16	-0.222	Cytosol
	Rid.01g019890.m1	RidUGT8	463	52.4363	5.58	44.97	92.2	-0.213	Cytosol
	Rid.01g019900.m1	RidUGT9	465	52.8193	5.32	43.18	88.04	-0.267	Mitochondrion
	Rid.01g019910.m1	RidUGT10	485	54.9386	5.56	46.37	89.24	-0.288	Cell membrane
	Rid.01g022780.m1	RidUGT11	485	53.9256	5.52	39.32	92.04	-0.157	Cytosol
	Rid.01g025820.m1	RidUGT12	483	53.1385	5.35	42.77	96.83	0.001	Chloroplast
	Rid.01g032090.m1	RidUGT13	322	36.1492	4.71	37.22	90.22	-0.107	Cytosol
	Rid.01g039120.m1	RidUGT14	462	51.1085	5.4	40.59	90.54	-0.085	Chloroplast
	Rid.01g039140.m1	RidUGT15	490	55.1703	5.45	36.9	84.1	-0.189	Chloroplast
	Rid.02g042350.m1	RidUGT16	461	52.2027	5.12	42.85	87.07	-0.215	Cytosol
	Rid.02g044160.m1	RidUGT17	426	47.2213	5.2	37.14	93.31	-0.07	Chloroplast
	Rid.02g044210.m1	RidUGT18	481	53.0994	5.55	41.53	93.16	-0.029	Cytosol
	Rid.02g044220.m1	RidUGT19	550	60.8542	5.19	37.55	88.78	-0.094	Chloroplast
	Rid.02g044720.m1	RidUGT20	483	54.001	5.64	42.31	88.22	-0.16	Chloroplast
	Rid.02g044730.m1	RidUGT21	448	50.2497	5.47	46.71	89.64	-0.14	Nucleus
	Rid.02g044740.m1	RidUGT22	331	37.4834	4.89	45.47	85.41	-0.35	Cytosol
	Rid.02g044770.m1	RidUGT23	486	54.228	5.5	43.5	84.63	-0.216	Chloroplast
	Rid.02g047510.m1	RidUGT24	163	17.6141	5.25	34	89.57	-0.104	Chloroplast; Cytoplasm; Peroxisome
	Rid.02g047600.m1	RidUGT25	450	50.3351	6.33	43.42	88.13	-0.149	Chloroplast
	Rid.02g048940.m1	RidUGT26	477	51.9015	5.45	42.63	103.21	0.159	Chloroplast
	Rid.02g048960.m1	RidUGT27	479	52.1742	5.89	40.82	99.94	0.129	Cytosol
	Rid.02g057330.m1	RidUGT28	404	43.9034	5.44	31.11	93.66	0.007	Cytosol
	Rid.02g063330.m1	RidUGT29	363	41.3506	4.82	43.64	88.84	-0.093	Cytosol
	Rid.02g063370.m1	RidUGT30	460	51.9723	5.07	40.5	84.3	-0.245	Chloroplast
	Rid.02g083090.m1	RidUGT31	502	55.1915	5.93	36	95.52	0.023	Chloroplast
	Rid.02g086850.m1	RidUGT32	479	53.2771	5.57	46.47	94.59	-0.043	Cytosol
	Rid.03g094400.m1	RidUGT33	450	50.2323	6.94	45.37	94.62	0.022	Chloroplast
	Rid.03g094420.m1	RidUGT34	333	37.0449	5.42	45.7	92.16	0.009	Nucleus
	Rid.03g094430.m1	RidUGT35	412	45.8655	5.23	41.52	87.74	-0.136	Cytosol
	Rid.03g102050.m1	RidUGT36	472	52.6657	5.18	43	96.69	0.031	Cytosol
	Rid.03g107110.m1	RidUGT37	467	51.8397	5.83	38.27	87.69	-0.094	Chloroplast
	Rid.03g107160.m1	RidUGT38	231	25.8496	4.67	45.01	91.95	-0.163	Chloroplast
	Rid.03g107170.m1	RidUGT39	483	54.0311	5.65	42.25	88.22	-0.151	Chloroplast
	Rid.03g109290.m1	RidUGT40	469	52.3089	5.82	42.17	91.45	-0.006	Cytosol
	Rid.03g110580.m1	RidUGT41	481	54.0647	5.46	36.43	91.83	-0.119	Extracellular
	Rid.03g121400.m1	RidUGT42	378	41.8069	5.43	46.66	92.3	0.006	Cell membrane; Chloroplast; Nucleus
	Rid.03g126610.m1	RidUGT43	480	53.9799	6.13	40.99	79.38	-0.237	Chloroplast
	Rid.03g126640.m1	RidUGT44	491	55.2144	5.86	40.47	84.93	-0.186	Chloroplast
	Rid.03g127180.m1	RidUGT45	481	53.9458	5.94	41.78	82.25	-0.207	Peroxisome
	Rid.03g130320.m1	RidUGT46	473	52.9759	6.41	29.78	92.28	-0.037	Cytosol
	Rid.03g136260.m1	RidUGT47	486	54.6251	6.46	43.57	94.07	-0.054	Cell membrane
	Rid.03g136310.m1	RidUGT48	444	50.1345	5.34	45.32	92.68	-0.134	Cytosol
	Rid.03g137430.m1	RidUGT49	481	52.3601	5.81	42.09	96.03	-0.025	Chloroplast
	Rid.03g138710.m1	RidUGT50	871	97.7478	5.63	40.66	86.44	-0.15	Cytosol
	Rid.03g139780.m1	RidUGT51	471	51.2279	5.55	40.83	97.2	0.081	Cytosol
	Rid.04g147100.m1	RidUGT52	488	54.7219	5.44	40.01	84.88	-0.092	Cytosol
	Rid.04g147780.m1	RidUGT53	272	30.221	8.37	30.58	83.82	-0.265	Cytosol
	Rid.04g152350.m1	RidUGT54	471	51.8742	6.04	40.93	107.6	0.138	Chloroplast
	Rid.04g153570.m1	RidUGT55	468	50.9103	6.19	30.62	97.26	0.003	Chloroplast
	Rid.04g170710.m1	RidUGT56	468	52.2376	5.37	42.75	90.6	-0.213	Chloroplast
	Rid.04g170750.m1	RidUGT57	467	52.1112	5.08	42.43	85.82	-0.263	Chloroplast
	Rid.04g170760.m1	RidUGT58	407	45.4097	5.56	39.16	89.58	-0.193	Chloroplast
	Rid.04g170780.m1	RidUGT59	471	52.2925	5.15	44.59	83.82	-0.228	Chloroplast
	Rid.04g170790.m1	RidUGT60	471	52.2493	4.99	45.96	84.25	-0.254	Chloroplast
	Rid.04g170810.m1	RidUGT61	470	52.1014	5	48.46	88.55	-0.144	Chloroplast
	Rid.04g170860.m1	RidUGT62	471	52.3808	5.04	47.39	88.79	-0.137	Chloroplast
	Rid.04g171520.m1	RidUGT63	452	50.4465	5.74	40.84	93.54	0.022	Chloroplast
	Rid.04g172050.m1	RidUGT64	505	57.0625	5.77	50.34	80.28	-0.274	Nucleus
	Rid.04g172480.m1	RidUGT65	443	49.7562	6.61	38.91	82.48	-0.279	Mitochondrion
	Rid.04g172490.m1	RidUGT66	476	53.3014	6.54	42.81	86.79	-0.178	Chloroplast
	Rid.04g172820.m1	RidUGT67	496	54.7564	5.81	49.03	87.08	-0.129	Chloroplast
	Rid.04g172830.m1	RidUGT68	271	30.0562	5.52	52.19	88.78	-0.22	Chloroplast
	Rid.04g179080.m1	RidUGT69	487	53.8058	5.58	42.83	92.42	-0.046	Cell membrane; Chloroplast; Cytosol
	Rid.04g179090.m1	RidUGT70	397	43.9661	6.5	45.48	102.59	0.151	Cell membrane; Chloroplast
	Rid.04g186170.m1	RidUGT71	463	49.9123	6.41	37.63	87.65	0.012	Chloroplast
	Rid.05g191670.m1	RidUGT72	482	53.6674	5.2	43.32	88.8	-0.15	Nucleus
	Rid.05g191690.m1	RidUGT73	486	54.4164	5.09	42.12	87.06	-0.182	Cytosol
	Rid.05g191700.m1	RidUGT74	486	54.6501	5.54	43.28	93.09	-0.14	Chloroplast
	Rid.05g191710.m1	RidUGT75	453	50.6321	5.34	42.78	90.4	-0.132	Chloroplast; Nucleus
	Rid.05g191720.m1	RidUGT76	295	33.3393	4.87	50.51	89.56	-0.243	Nucleus
	Rid.05g191740.m1	RidUGT77	486	54.4965	5.52	41.38	86.05	-0.203	Cytosol
	Rid.05g191840.m1	RidUGT78	486	54.4305	5.64	41.62	87.65	-0.187	Cytosol
	Rid.05g194720.m1	RidUGT79	455	51.1345	5.11	46.11	94.86	-0.09	Chloroplast; Mitochondrion
	Rid.05g198270.m1	RidUGT80	299	33.0377	5.04	54.56	89	-0.254	Cytosol
	Rid.05g198290.m1	RidUGT81	483	53.4813	5.66	52.4	89.86	-0.07	Chloroplast
	Rid.05g206510.m1	RidUGT82	459	51.3141	6.08	47.17	89.17	-0.114	Chloroplast
	Rid.05g210290.m1	RidUGT83	515	58.3268	6.13	47.61	76.85	-0.332	Nucleus
	Rid.05g212790.m1	RidUGT84	522	57.4463	5.82	51.82	78.66	-0.376	Chloroplast
	Rid.05g224130.m1	RidUGT85	472	51.8858	5.34	39.61	94.17	0.009	Cytosol
	Rid.05g224140.m1	RidUGT86	479	52.3683	5.8	37.73	95.82	-0.028	Chloroplast
	Rid.05g224270.m1	RidUGT87	329	36.6089	6.1	43.14	82.07	-0.311	Cytosol
	Rid.05g232150.m1	RidUGT88	491	54.175	5.83	38.43	94.03	-0.113	Chloroplast
	Rid.05g232860.m1	RidUGT89	464	51.1835	5.83	39	90.15	-0.161	Cytosol
	Rid.05g234950.m1	RidUGT90	428	47.4202	4.99	45.93	91.05	-0.07	Cytosol
	Rid.06g243010.m1	RidUGT91	461	51.6656	5.96	46.64	89.05	-0.125	Chloroplast
	Rid.06g249580.m1	RidUGT92	497	55.2174	5.4	48.56	95.96	-0.006	Nucleus
	Rid.06g249600.m1	RidUGT93	472	53.0489	5.88	42.5	95.42	-0.069	Cytosol
	Rid.06g253340.m1	RidUGT94	491	55.3273	6.32	42.7	95.62	-0.148	Cytosol
	Rid.06g253360.m1	RidUGT95	491	55.3002	5.99	37.92	95.05	-0.104	Extracellular
	Rid.06g254240.m1	RidUGT96	445	49.9126	5.42	39.66	93.75	-0.091	Cytosol
	Rid.06g254250.m1	RidUGT97	517	58.0622	5.63	45.49	98.97	-0.101	Endoplasmic reticulum
	Rid.06g254260.m1	RidUGT98	498	55.7887	7.48	49.39	90.42	-0.172	Nucleus
	Rid.06g263300.m1	RidUGT99	341	38.2394	5.41	41.68	79.97	-0.346	Nucleus
	Rid.06g283540.m1	RidUGT100	479	53.3642	5.12	43.44	93.4	-0.039	Chloroplast
	Rid.06g283550.m1	RidUGT101	474	52.8263	5.21	41.01	86.16	-0.117	Nucleus
	Rid.06g283560.m1	RidUGT102	475	52.8104	5.07	45.02	89.05	-0.085	Chloroplast
	Rid.06g283800.m1	RidUGT103	474	53.3891	8.16	34.52	95.23	-0.086	Chloroplast
	Rid.06g283910.m1	RidUGT104	476	53.1613	5.64	38.48	92.58	-0.053	Chloroplast
	Rid.06g283930.m1	RidUGT105	396	44.3652	5.22	34.89	90.35	-0.045	Chloroplast
	Rid.06g283940.m1	RidUGT106	175	19.5394	5.39	42.66	76.29	-0.257	Nucleus
	Rid.06g283950.m1	RidUGT107	175	19.5394	5.39	42.66	76.29	-0.257	Nucleus
	Rid.06g283960.m1	RidUGT108	485	53.8289	5.31	41.73	86.45	-0.127	Chloroplast
	Rid.06g283990.m1	RidUGT109	466	51.9167	5.01	38.12	92.45	-0.068	Chloroplast
	Rid.06g284000.m1	RidUGT110	480	53.6478	5.42	32.26	86.52	-0.093	Chloroplast
	Rid.06g284010.m1	RidUGT111	480	53.8672	5.47	39.42	90.17	-0.07	Chloroplast
	Rid.06g284040.m1	RidUGT112	486	54.377	5.8	40.91	98.46	0.069	Chloroplast
	Rid.06g291310.m1	RidUGT113	454	50.6349	6.19	36.45	97.51	-0.004	Endoplasmic reticulum
	Rid.06g291790.m1	RidUGT114	462	51.1851	5.76	49.73	101.32	-0.024	Cytosol
	Rid.06g294370.m1	RidUGT115	176	19.7886	4.81	42.37	89.03	-0.285	Chloroplast
	Rid.07g301460.m1	RidUGT116	472	51.9198	5.72	39.79	100.57	0.053	Cytosol
	Rid.07g308440.m1	RidUGT117	455	51.7035	5.78	48.59	93.14	-0.054	Cytosol
	Rid.07g308460.m1	RidUGT118	455	51.0459	7.23	49.98	94.09	-0.116	Chloroplast
	Rid.07g308470.m1	RidUGT119	463	52.0991	6.92	46.73	94.34	-0.088	Nucleus
	Rid.07g308480.m1	RidUGT120	348	39.2361	5.89	43.22	91.9	-0.004	Cytosol
	Rid.07g309260.m1	RidUGT121	456	50.2823	5.39	50.44	93.66	-0.056	Chloroplast
	Rid.07g316120.m1	RidUGT122	491	54.5585	5.37	49.92	89.78	-0.042	Nucleus
	Rid.07g316170.m1	RidUGT123	482	53.8907	5.61	48.94	87.78	-0.168	Chloroplast
	Rid.07g319680.m1	RidUGT124	510	57.1128	5.98	46.65	92.12	-0.011	Chloroplast
	Rid.07g323130.m1	RidUGT125	482	52.2603	5.68	46.11	72.26	-0.298	Chloroplast
	Rid.07g323260.m1	RidUGT126	466	52.5333	5.71	44.21	84.7	-0.264	Cytosol
	Rid.07g340830.m1	RidUGT127	212	23.6389	5.65	43.61	86.84	-0.182	Cytosol
	Rid.07g340850.m1	RidUGT128	469	51.8899	6.08	44.87	98.76	0.018	Chloroplast
	Rid.07g340860.m1	RidUGT129	417	46.3754	6.34	48.77	90	-0.026	Cytosol
	Rid.07g341880.m1	RidUGT130	481	53.1023	6.65	40.7	91.79	-0.121	Chloroplast
R. occidentalis	Ro01_G00985	RocUGT1	1066	117.485	5.92	46.08	95.21	-0.05	Plasma membrane
	Ro01_G04167	RocUGT2	485	54.0468	5.45	38.61	91.24	-0.156	Cytosol
	Ro01_G15230	RocUGT3	964	108.829	5.65	47.44	90.9	-0.232	Cytosol
	Ro01_G29465	RocUGT4	485	54.6836	5.95	39.13	83.75	-0.247	Chloroplast
	Ro01_G29466	RocUGT5	488	54.8527	5.26	35.74	83.05	-0.207	Chloroplast
	Ro01_G29468	RocUGT6	166	18.7645	5.73	41.42	82.83	-0.442	Chloroplast
	Ro01_G29827	RocUGT7	964	109.746	5.7	47.21	89.7	-0.265	Cytosol
	Ro01_G29828	RocUGT8	474	53.5573	5.47	44.18	90.06	-0.246	Endoplasmic reticulum
	Ro01_G29865	RocUGT9	480	54.184	6.04	36.42	80.19	-0.316	Peroxisome
	Ro01_G29867	RocUGT10	480	53.9378	5.74	43.6	85.25	-0.185	Chloroplast
	Ro01_G29868	RocUGT11	543	61.1329	5.46	40.09	81.84	-0.214	Chloroplast
	Ro01_G29869	RocUGT12	480	53.9728	5.32	47.27	85.46	-0.195	Chloroplast
	Ro01_G30110	RocUGT13	470	52.8713	5.5	42.71	83.98	-0.216	Cytosol
	Ro02_G00774	RocUGT14	491	54.0583	6.03	36.83	95.68	0.02	Chloroplast
	Ro02_G02402	RocUGT15	469	52.0988	5.56	46.27	94.09	-0.038	Cytosol
	Ro02_G05481	RocUGT16	561	62.0966	5.19	38.08	88.77	-0.094	Chloroplast
	Ro02_G21471	RocUGT17	503	56.9674	5.57	42.95	92.03	-0.177	Cytosol
	Ro02_G22005	RocUGT18	477	51.7904	5.39	40.34	103.44	0.158	Chloroplast
	Ro02_G27972	RocUGT19	407	44.6757	5.92	36.83	105.9	0.191	Cell membrane; Chloroplast; Nucleus
	Ro02_G35242	RocUGT20	460	51.9704	5.17	40.9	81.98	-0.237	Cytosol
	Ro02_G35243	RocUGT21	459	51.9187	5.11	41.83	87.45	-0.132	Cytosol
	Ro02_G35244	RocUGT22	286	32.6152	5.11	38.04	85.52	-0.303	Cytosol
	Ro02_G35838	RocUGT23	303	33.4583	6.17	22.82	86.14	-0.265	Cytosol
	Ro02_G35954	RocUGT24	496	55.503	5.97	35.32	79.8	-0.343	Nucleus
	Ro02_G35955	RocUGT25	394	44.6395	5.35	49.09	91.52	-0.112	Cytosol
	Ro02_G35960	RocUGT26	980	109.554	6.23	46.05	89.95	-0.126	Endoplasmic reticulum
	Ro02_G35961	RocUGT27	498	55.9562	5.6	42.41	85.18	-0.174	Chloroplast
	Ro02_G35963	RocUGT28	499	56.2555	5.2	40.04	92.42	-0.147	Cytoskeleton
	Ro02_G35964	RocUGT29	496	55.7472	5.68	48.88	90.6	-0.124	Chloroplast
	Ro02_G35966	RocUGT30	320	36.1726	5.14	43.65	92.62	-0.15	Cytosol
	Ro02_G35994	RocUGT31	477	53.052	5.46	40.71	93.14	-0.083	Cytosol
	Ro02_G35996	RocUGT32	474	52.3775	5.5	39.47	91.08	-0.03	Chloroplast
	Ro02_G35999	RocUGT33	472	51.9761	5.46	41.49	94.94	0.017	Chloroplast
	Ro03_G05827	RocUGT34	472	52.7909	5.28	44.09	97.08	0.039	Cytosol
	Ro03_G14530	RocUGT35	473	51.4746	5.84	37.66	97.82	0.129	Cytosol
	Ro03_G31868	RocUGT36	208	23.1816	4.59	44.9	88.99	0.034	Cytosol
	Ro03_G31883	RocUGT37	320	36.1171	6.02	40.74	90.44	0.06	Cytosol
	Ro03_G31886	RocUGT38	505	56.5213	5.49	35.03	88.59	-0.054	Chloroplast
	Ro03_G31887	RocUGT39	396	44.502	8.06	44.5	86.11	-0.291	Chloroplast
	Ro03_G31950	RocUGT40	148	16.7191	6.83	41.46	74.39	-0.444	Chloroplast
	Ro03_G31951	RocUGT41	424	47.1511	6.38	37.28	94.95	-0.192	Nucleus
	Ro03_G31953	RocUGT42	364	40.9059	5.71	39.58	94.81	-0.106	Nucleus
	Ro03_G32113	RocUGT43	473	52.988	6.41	30.1	93.11	-0.026	Cytosol
	Ro03_G32215	RocUGT44	481	54.017	6.12	41.41	82.85	-0.205	Peroxisome
	Ro03_G32216	RocUGT45	657	74.5361	8.89	45.77	83.21	-0.295	Chloroplast
	Ro03_G32822	RocUGT46	852	95.459	6.07	42.05	89.86	-0.178	Chloroplast
	Ro03_G32823	RocUGT47	558	62.6559	5.54	40.16	85.61	-0.234	Cytosol
	Ro03_G32839	RocUGT48	468	51.8805	5.46	39.98	87.71	-0.061	Chloroplast
	Ro03_G32841	RocUGT49	360	39.8289	5.08	33.62	90.19	-0.033	Chloroplast
	Ro04_G13298	RocUGT50	1172	130.391	5.85	51.79	87.78	-0.174	Nucleus
	Ro04_G15150	RocUGT51	487	53.2117	5.81	41.57	109.49	0.201	Chloroplast
	Ro04_G36125	RocUGT52	488	54.6949	5.52	39.48	84.88	-0.088	Cytosol
	Ro04_G36189	RocUGT53	471	51.1427	6.21	31.35	100.59	0.047	Chloroplast
	Ro04_G36191	RocUGT54	448	48.5558	5.71	25.69	102.25	0.084	Chloroplast
	Ro04_G36623	RocUGT55	468	52.3633	7.11	41.07	87.86	-0.174	Chloroplast
	Ro04_G36624	RocUGT56	467	52.5684	6.69	40.1	81.37	-0.299	Cytosol
	Ro04_G36884	RocUGT57	444	49.1085	5.89	41.99	93.92	-0.1	Cytosol
	Ro04_G36885	RocUGT58	410	45.1568	5.15	48.67	91.29	0.034	Chloroplast
	Ro04_G37012	RocUGT59	435	48.7603	5.45	37.37	88.09	-0.038	Chloroplast
	Ro04_G37231	RocUGT60	464	50.1025	6.41	39.24	86.42	-0.012	Chloroplast
	Ro05_G03386	RocUGT61	491	54.208	5.83	38.58	93.03	-0.119	Chloroplast
	Ro05_G09341	RocUGT62	486	54.4655	5.45	39.53	87.45	-0.198	Cytosol
	Ro05_G13824	RocUGT63	493	54.0884	5.22	39.11	95.46	0.052	Nucleus
	Ro05_G25325	RocUGT64	977	107.717	6.12	51.49	82.23	-0.318	Nucleus
	Ro05_G30511	RocUGT65	463	51.6101	5.22	46.37	90.93	-0.131	Cytosol
	Ro05_G30544	RocUGT66	464	51.2036	5.87	39.4	90.15	-0.165	Cytosol
	Ro05_G30704	RocUGT67	253	28.4113	6.08	36.19	79.05	-0.41	Chloroplast
	Ro05_G30707	RocUGT68	1408	154.114	5.37	37.67	96.65	-0.001	Cytosol
	Ro05_G31064	RocUGT69	246	27.9974	6.03	34.76	84.31	-0.247	Chloroplast
	Ro05_G31485	RocUGT70	433	48.3094	6.75	43.77	84.2	-0.238	Chloroplast
	Ro05_G31486	RocUGT71	393	43.8551	5.16	52.04	91.27	-0.11	Chloroplast
	Ro05_G31669	RocUGT72	484	54.1972	5.05	51.26	89.65	-0.167	Chloroplast
	Ro05_G31671	RocUGT73	486	54.5896	5.46	42.93	85.84	-0.216	Nucleus
	Ro05_G31675	RocUGT74	499	55.6601	6.1	40.2	88.12	-0.15	Chloroplast
	Ro05_G31676	RocUGT75	485	54.3883	5.32	38.67	86.87	-0.201	Cytosol
	Ro05_G31680	RocUGT76	1497	168.407	5.29	42.79	87.73	-0.21	Chloroplast
	Ro06_G08192	RocUGT77	461	51.6506	5.99	48.21	88.2	-0.138	Chloroplast
	Ro06_G08419	RocUGT78	890	99.5512	6.63	48.53	92.06	-0.087	Plasma membrane
	Ro06_G08420	RocUGT79	2397	266.595	5.39	46.47	87.55	-0.186	Extracellular
	Ro06_G08436	RocUGT80	519	58.5463	8.54	35.17	94.86	-0.042	Chloroplast
	Ro06_G08444	RocUGT81	1332	145.718	6.29	41.07	81.87	-0.15	Cytosol
	Ro06_G09752	RocUGT82	471	52.8406	5.96	40.64	82.93	-0.202	Chloroplast
	Ro06_G09861	RocUGT83	814	91.0769	5.98	47.38	98.59	0.013	Nucleus
	Ro06_G14355	RocUGT84	354	38.9213	6.37	38.42	96.89	0.128	Nucleus
	Ro06_G17652	RocUGT85	513	57.6206	6.45	45.7	78.99	-0.41	Chloroplast
	Ro06_G18337	RocUGT86	699	76.8646	6	51.8	96.28	0.068	Chloroplast
	Ro06_G20165	RocUGT87	715	80.1237	6.44	37.4	92.49	-0.181	Chloroplast
	Ro06_G23501	RocUGT88	607	67.3318	5.4	44.88	94.33	0.037	Nucleus; Cytosol
	Ro06_G28556	RocUGT89	961	107.275	5.53	39.56	94.55	-0.075	Chloroplast
	Ro06_G28557	RocUGT90	476	53.2776	5.47	41.2	89.73	-0.033	Chloroplast
	Ro06_G28558	RocUGT91	485	53.871	5.44	41.66	86.04	-0.143	Chloroplast
	Ro06_G28559	RocUGT92	436	49.0621	5.68	45.89	81.56	-0.161	Chloroplast
	Ro06_G28560	RocUGT93	891	99.6207	5.25	34.23	87.97	-0.084	Chloroplast
	Ro06_G28561	RocUGT94	511	57.3196	4.93	38.27	87.93	-0.148	Chloroplast
	Ro06_G28562	RocUGT95	473	53.7155	7.16	31.88	94.55	0.011	Chloroplast
	Ro06_G28668	RocUGT96	373	42.3528	5.96	39.9	86.54	-0.211	Cytosol
	Ro06_G28669	RocUGT97	270	30.8917	6.35	46.21	84.19	-0.195	Cytosol
	Ro06_G28672	RocUGT98	924	102.152	5.93	47.42	91.7	-0.131	Chloroplast
	Ro06_G29056	RocUGT99	457	51.46	5.94	43.74	97.64	-0.088	Cytosol
	Ro06_G29057	RocUGT100	447	50.7784	6.45	40.8	103.29	0.012	Cell membrane
	Ro06_G29065	RocUGT101	1898	214.267	5.77	43.16	91.5	-0.109	Plasma membrane
	Ro06_G29078	RocUGT102	489	54.5411	5.84	37.35	98.43	-0.09	Cytosol
	Ro06_G29079	RocUGT103	506	56.967	7.84	52.45	88.99	-0.218	Nucleus
	Ro06_G29080	RocUGT104	517	58.0722	5.63	46.8	98.61	-0.088	Cytosol
	Ro06_G29081	RocUGT105	643	72.0042	6.23	36.53	97.53	-0.081	Cytosol
	Ro07_G04358	RocUGT106	730	79.856	6.36	42.63	87.47	-0.113	Chloroplast
	Ro07_G08977	RocUGT107	465	50.501	5.45	35.75	95.98	0.129	Chloroplast
	Ro07_G18091	RocUGT108	509	55.5702	6.15	47.49	72.46	-0.302	Nucleus
	Ro07_G23936	RocUGT109	1776	199.723	5.95	44.66	88.73	-0.103	Chloroplast; Mitochondrion
	Ro07_G33284	RocUGT110	517	57.018	8.09	40.34	94.64	-0.09	Chloroplast
	Ro07_G33285	RocUGT111	191	20.864	5.48	42.39	91.36	-0.001	Cytosol
	Ro07_G33309	RocUGT112	483	53.8326	5.63	42.03	85.59	-0.135	Chloroplast
	Ro07_G33310	RocUGT113	476	52.7067	6.29	47.72	91.13	-0.076	Chloroplast
	Ro07_G33311	RocUGT114	477	53.2871	5.71	48.06	85.85	-0.12	Chloroplast
	Ro07_G33315	RocUGT115	313	34.834	4.88	43.14	97.44	0.105	Cytosol
	Ro07_G34554	RocUGT116	457	51.3772	6.71	47.55	95.58	-0.073	Nucleus
	Ro07_G34555	RocUGT117	455	50.9409	6.73	48.51	94.95	-0.06	Chloroplast
	Ro07_G34556	RocUGT118	348	39.2332	5.85	42.37	93.85	-0.001	Cytosol
	Ro07_G34561	RocUGT119	477	53.0031	6.16	48.39	92.98	-0.07	Cytosol
	Ro07_G34562	RocUGT120	473	53.7878	5.91	47.07	92.07	-0.073	Cytosol
	Ro07_G34696	RocUGT121	466	50.8963	5.57	47.14	96.39	-0.002	Cytosol

## Sheet: Table S2
Table S2. Primer sequences used RT-PCR
Sequence ID	Gene Name	Forward/Reverse	Primers (5‘——3’)
LG01.1464	RchActin	F	GTTGGTATGGGTCAGAAGG
		R	CAGGCACATTGAAGGTCTC
LG07.4009	RchUGT168	F	TTGTCGCTGTTCCTTTACTT
		R	CTTCGTCCTTACGGTTCTG
LG04.2568	RchUGT85	F	CGGTCAAGATGATAGGTCC
		R	CTTCCAAACGACGCATAAA
LG04.2301	RchUGT81	F	ATTACCAGGACTGCCACTA
		R	ATTGACTACACCACGGGAC
LG06.321	RchUGT139	F	CTCGCCTTCTACGGCTTCA
		R	TGAGCACTAGGGTTTATGGA
LG05.3444	RchUGT98	F	AACTCGGTGCTAGAATCGG
		R	CCATCAACTCCCTAACCCT
LG07.1014	RchUGT157	F	AACCGACGGGTCAAACGAG
		R	TCCTCACAAACCGCCTAAA
LG02.2918	RchUGT25	F	TGCTAGATTGGCTGGATGT
		R	GAACCCTTCAGGCAAATAC
LG02.460	RchUGT46	F	GTGTACGTCGGAAACCTGA
		R	CCAGCCATTCTTACCATCTA
LG05.2171	RchUGT95	F	CATCGCCCGAAATTACCAT
		R	AACACTTCCTGCGTCTTACTC
LG04.150	RchUGT75	F	AGTCCTAGACACGGTTGCC
		R	CGATGCTGCCGAAGTTGAT
LG05.4049	RchUGT102	F	TCCACATAACAGAACGAGCAG
		R	TCCAGCCATTCCAAACACT
LG07.2926	RchUGT162	F	GGCTCCATAGCGTTGATGT
		R	CGTCGTCTTCGGTGTAGTTAG
LG07.3915	RchUGT165	F	CCTTGTTTGCTTGGGATGG
		R	TTCGTTGCGTGTCACTTCG
LG01.2406	RchUGT12	F	TGGTCCGAGGAGCGAGTTG
		R	TCCCACCGAGGAATGAGCC
LG05.3446	RchUGT99	F	GGGGCTCCTTTGAGGGCTGTA
		R	CCGACTCGGCTGCTTATCG
LG02.3339	RchUGT26	F	GTCCGCAATCCACCTTCTA
		R	CACCGAGTTCCAACCACAG
LG05.2170	RchUGT94	F	AGGAGGATTCTTGTCGCATTG
		R	TGGCGTCGGAGTGTTGGTC
LG02.4273	RchUGT36	F	CTGAATGCGTCGGCAAGGA
		R	GAGCTGCGGGAGGTACAAG
LG01.1904	RchUGT9	F	GCTTCCGACAGGCTTATTG
		R	ATGGCAGCATGATTAGAGG
LG06.1278	RchUGT134	F	GCGATGATGATAAAGTGGG
		R	GCCGTCCGATGGAGAAACC

## Sheet: Table S3
Table S3 The replication ways of UGTs gene in Rubus
Species	Sequence ID	Gene Name	Genes Replicate
R. chingii	LG01.1780	RchUGT1	Tandem
	LG01.1781	RchUGT2	Tandem
	LG01.1783	RchUGT3	Tandem
	LG01.1784	RchUGT4	Tandem
	LG01.1785	RchUGT5	Tandem
	LG01.1786	RchUGT6	Tandem
	LG01.1899	RchUGT7	Proximal
	LG01.1902	RchUGT8	Tandem
	LG01.1904	RchUGT9	Singleton
	LG01.2143	RchUGT10	Singleton
	LG01.2404	RchUGT11	Singleton
	LG01.2406	RchUGT12	Tandem
	LG01.2952	RchUGT13	Singleton
	LG01.3564	RchUGT14	Tandem
	LG01.3565	RchUGT15	Tandem
	LG02.116	RchUGT16	Dispersed
	LG02.2191	RchUGT17	Tandem
	LG02.2192	RchUGT18	Tandem
	LG02.2193	RchUGT19	Tandem
	LG02.2194	RchUGT20	Tandem
	LG02.2195	RchUGT21	Tandem
	LG02.2651	RchUGT22	WGD or Segmental
	LG02.2654	RchUGT23	Proximal
	LG02.2782	RchUGT24	Dispersed
	LG02.2918	RchUGT25	WGD or Segmental
	LG02.3339	RchUGT26	Dispersed
	LG02.3505	RchUGT27	Dispersed
	LG02.3921	RchUGT28	Dispersed
	LG02.4196	RchUGT29	Tandem
	LG02.4199	RchUGT30	Proximal
	LG02.4204	RchUGT31	Tandem
	LG02.4205	RchUGT32	Tandem
	LG02.4206	RchUGT33	Tandem
	LG02.4207	RchUGT34	Tandem
	LG02.4211	RchUGT35	Proximal
	LG02.4273	RchUGT36	Tandem
	LG02.4444	RchUGT37	Tandem
	LG02.4445	RchUGT38	Tandem
	LG02.4448	RchUGT39	Tandem
	LG02.4449	RchUGT40	Tandem
	LG02.4450	RchUGT41	Tandem
	LG02.4451	RchUGT42	Tandem
	LG02.4452	RchUGT43	Tandem
	LG02.4453	RchUGT44	Tandem
	LG02.4454	RchUGT45	Tandem
	LG02.460	RchUGT46	Dispersed
	LG03.1225	RchUGT47	WGD or Segmental
	LG03.1773	RchUGT48	Tandem
	LG03.1774	RchUGT49	Tandem
	LG03.1775	RchUGT50	Tandem
	LG03.1776	RchUGT51	Tandem
	LG03.1778	RchUGT52	Tandem
	LG03.1779	RchUGT53	Tandem
	LG03.1780	RchUGT54	Tandem
	LG03.1781	RchUGT55	Tandem
	LG03.1782	RchUGT56	Tandem
	LG03.1783	RchUGT57	Tandem
	LG03.1784	RchUGT58	Tandem
	LG03.1785	RchUGT59	Tandem
	LG03.1786	RchUGT60	Tandem
	LG03.1787	RchUGT61	Tandem
	LG03.1788	RchUGT62	Tandem
	LG03.1998	RchUGT63	Dispersed
	LG03.2108	RchUGT64	Dispersed
	LG03.3373	RchUGT65	WGD or Segmental
	LG03.3569	RchUGT66	Dispersed
	LG03.4144	RchUGT67	WGD or Segmental
	LG03.4688	RchUGT68	Dispersed
	LG03.4806	RchUGT69	Tandem
	LG03.4807	RchUGT70	Tandem
	LG03.4917	RchUGT71	Dispersed
	LG03.569	RchUGT72	Tandem
	LG03.570	RchUGT73	Tandem
	LG03.571	RchUGT74	Tandem
	LG04.150	RchUGT75	Dispersed
	LG04.211	RchUGT76	WGD or Segmental
	LG04.212	RchUGT77	Tandem
	LG04.213	RchUGT78	Tandem
	LG04.214	RchUGT79	Tandem
	LG04.2298	RchUGT80	Proximal
	LG04.2301	RchUGT81	Tandem
	LG04.2531	RchUGT82	Tandem
	LG04.2535	RchUGT83	Proximal
	LG04.2567	RchUGT84	Tandem
	LG04.2568	RchUGT85	Tandem
	LG04.2614	RchUGT86	Dispersed
	LG04.3361	RchUGT87	Dispersed
	LG04.3957	RchUGT88	Tandem
	LG04.3958	RchUGT89	Tandem
	LG04.612	RchUGT90	WGD or Segmental
	LG04.742	RchUGT91	WGD or Segmental
	LG04.743	RchUGT92	Tandem
	LG05.1154	RchUGT93	WGD or Segmental
	LG05.2170	RchUGT94	Tandem
	LG05.2171	RchUGT95	Tandem
	LG05.2375	RchUGT96	Dispersed
	LG05.2662	RchUGT97	Dispersed
	LG05.3444	RchUGT98	Proximal
	LG05.3446	RchUGT99	Proximal
	LG05.3832	RchUGT100	Dispersed
	LG05.389	RchUGT101	WGD or Segmental
	LG05.4049	RchUGT102	Tandem
	LG05.4050	RchUGT103	Tandem
	LG05.4051	RchUGT104	Tandem
	LG05.4058	RchUGT105	Tandem
	LG05.4059	RchUGT106	Tandem
	LG05.4060	RchUGT107	Tandem
	LG05.4061	RchUGT108	Tandem
	LG05.4062	RchUGT109	Tandem
	LG05.4066	RchUGT110	Tandem
	LG05.4067	RchUGT111	Tandem
	LG05.4068	RchUGT112	Tandem
	LG05.460	RchUGT113	WGD or Segmental
	LG06.1224	RchUGT114	Tandem
	LG06.1225	RchUGT115	Tandem
	LG06.1226	RchUGT116	Tandem
	LG06.1227	RchUGT117	Tandem
	LG06.1228	RchUGT118	Proximal
	LG06.1234	RchUGT119	Tandem
	LG06.1235	RchUGT120	Tandem
	LG06.1236	RchUGT121	Tandem
	LG06.1237	RchUGT122	Tandem
	LG06.1238	RchUGT123	Tandem
	LG06.1239	RchUGT124	Tandem
	LG06.1240	RchUGT125	Tandem
	LG06.1241	RchUGT126	Proximal
	LG06.1242	RchUGT127	Tandem
	LG06.1243	RchUGT128	Tandem
	LG06.1244	RchUGT129	Tandem
	LG06.1245	RchUGT130	Tandem
	LG06.1275	RchUGT131	WGD or Segmental
	LG06.1276	RchUGT132	Tandem
	LG06.1277	RchUGT133	Tandem
	LG06.1278	RchUGT134	Tandem
	LG06.1279	RchUGT135	Tandem
	LG06.1281	RchUGT136	Tandem
	LG06.1284	RchUGT137	Proximal
	LG06.3172	RchUGT138	Dispersed
	LG06.321	RchUGT139	Dispersed
	LG06.4016	RchUGT140	Tandem
	LG06.4018	RchUGT141	Tandem
	LG06.4021	RchUGT142	Tandem
	LG06.4022	RchUGT143	Tandem
	LG06.4094	RchUGT144	WGD or Segmental
	LG06.4098	RchUGT145	Tandem
	LG06.4099	RchUGT146	Tandem
	LG06.4100	RchUGT147	Tandem
	LG06.4101	RchUGT148	Tandem
	LG06.4454	RchUGT149	WGD or Segmental
	LG06.4457	RchUGT150	WGD or Segmental
	LG06.5198	RchUGT151	Dispersed
	LG06.556	RchUGT152	WGD or Segmental
	LG06.557	RchUGT153	Tandem
	LG06.596	RchUGT154	WGD or Segmental
	LG06.597	RchUGT155	Tandem
	LG06.598	RchUGT156	Tandem
	LG07.1014	RchUGT157	WGD or Segmental
	LG07.1697	RchUGT158	Tandem
	LG07.1698	RchUGT159	Tandem
	LG07.1907	RchUGT160	Dispersed
	LG07.2066	RchUGT161	Dispersed
	LG07.2926	RchUGT162	Dispersed
	LG07.297	RchUGT163	Dispersed
	LG07.3505	RchUGT164	Dispersed
	LG07.3915	RchUGT165	Tandem
	LG07.3917	RchUGT166	Tandem
	LG07.4008	RchUGT167	WGD or Segmental
	LG07.4009	RchUGT168	Tandem
	LG07.63	RchUGT169	Dispersed
	LG07.942	RchUGT170	Tandem
	LG07.943	RchUGT171	Tandem
	LG07.944	RchUGT172	Tandem
R. corchorifolius	Rf010014000	RcoUGT1	Tandem
	Rf010014010	RcoUGT2	Tandem
	Rf010014030	RcoUGT3	Proximal
	Rf010015090	RcoUGT4	Tandem
	Rf010015100	RcoUGT5	Tandem
	Rf010015110	RcoUGT6	Tandem
	Rf010015130	RcoUGT7	Proximal
	Rf010017650	RcoUGT8	WGD or Segmental
	Rf010020200	RcoUGT9	WGD or Segmental
	Rf010020210	RcoUGT10	Tandem
	Rf010020220	RcoUGT11	Tandem
	Rf010020240	RcoUGT12	Proximal
	Rf010025790	RcoUGT13	Dispersed
	Rf020035810	RcoUGT14	WGD or Segmental
	Rf020035830	RcoUGT15	Tandem
	Rf020036250	RcoUGT16	Tandem
	Rf020036260	RcoUGT17	Tandem
	Rf020036270	RcoUGT18	Tandem
	Rf020036300	RcoUGT19	Tandem
	Rf020036330	RcoUGT20	Tandem
	Rf020036340	RcoUGT21	Tandem
	Rf020036360	RcoUGT22	Tandem
	Rf020036370	RcoUGT23	Tandem
	Rf020036380	RcoUGT24	Tandem
	Rf020038400	RcoUGT25	Dispersed
	Rf020041980	RcoUGT26	Dispersed
	Rf020042950	RcoUGT27	Dispersed
	Rf020046400	RcoUGT28	Dispersed
	Rf020047300	RcoUGT29	Dispersed
	Rf020066890	RcoUGT30	Dispersed
	Rf020070020	RcoUGT31	WGD or Segmental
	Rf030074990	RcoUGT32	Dispersed
	Rf030076160	RcoUGT33	Tandem
	Rf030077100	RcoUGT34	Dispersed
	Rf030077930	RcoUGT35	WGD or Segmental
	Rf030077950	RcoUGT36	Tandem
	Rf030082650	RcoUGT37	WGD or Segmental
	Rf030087550	RcoUGT38	Dispersed
	Rf030089230	RcoUGT39	Dispersed
	Rf030095790	RcoUGT40	Dispersed
	Rf030096740	RcoUGT41	Dispersed
	Rf030098520	RcoUGT42	Tandem
	Rf030098530	RcoUGT43	Tandem
	Rf030098540	RcoUGT44	Tandem
	Rf030098550	RcoUGT45	Tandem
	Rf030102230	RcoUGT46	WGD or Segmental
	Rf030108010	RcoUGT47	Tandem
	Rf030108020	RcoUGT48	Tandem
	Rf030108030	RcoUGT49	Tandem
	Rf040115520	RcoUGT50	Dispersed
	Rf040121080	RcoUGT51	Dispersed
	Rf040125410	RcoUGT52	Proximal
	Rf040125430	RcoUGT53	Proximal
	Rf040127090	RcoUGT54	Tandem
	Rf040127110	RcoUGT55	Tandem
	Rf040127120	RcoUGT56	Tandem
	Rf040127140	RcoUGT57	Tandem
	Rf040127150	RcoUGT58	Tandem
	Rf040140530	RcoUGT59	Tandem
	Rf040141400	RcoUGT60	WGD or Segmental
	Rf040145530	RcoUGT61	Dispersed
	Rf050151010	RcoUGT62	Dispersed
	Rf050153670	RcoUGT63	Tandem
	Rf050153680	RcoUGT64	Tandem
	Rf050159990	RcoUGT65	Proximal
	Rf050160010	RcoUGT66	Proximal
	Rf050164370	RcoUGT67	Tandem
	Rf050164380	RcoUGT68	Tandem
	Rf050165120	RcoUGT69	Dispersed
	Rf050173450	RcoUGT70	WGD or Segmental
	Rf050179910	RcoUGT71	WGD or Segmental
	Rf050180560	RcoUGT72	WGD or Segmental
	Rf060187470	RcoUGT73	Dispersed
	Rf060189490	RcoUGT74	WGD or Segmental
	Rf060189500	RcoUGT75	Tandem
	Rf060189870	RcoUGT76	WGD or Segmental
	Rf060189880	RcoUGT77	Tandem
	Rf060189890	RcoUGT78	Tandem
	Rf060195370	RcoUGT79	Tandem
	Rf060195380	RcoUGT80	Tandem
	Rf060195410	RcoUGT81	Tandem
	Rf060195420	RcoUGT82	Tandem
	Rf060195430	RcoUGT83	Tandem
	Rf060195570	RcoUGT84	Dispersed
	Rf060195790	RcoUGT85	WGD or Segmental
	Rf060195800	RcoUGT86	Tandem
	Rf060195810	RcoUGT87	Tandem
	Rf060195830	RcoUGT88	Tandem
	Rf060195840	RcoUGT89	Tandem
	Rf060195860	RcoUGT90	Proximal
	Rf060211300	RcoUGT91	Dispersed
	Rf060218910	RcoUGT92	Tandem
	Rf060218920	RcoUGT93	Tandem
	Rf060218930	RcoUGT94	Tandem
	Rf060218970	RcoUGT95	Tandem
	Rf060218980	RcoUGT96	Tandem
	Rf060219760	RcoUGT97	Tandem
	Rf060219770	RcoUGT98	Tandem
	Rf060219780	RcoUGT99	Tandem
	Rf060222930	RcoUGT100	WGD or Segmental
	Rf060222940	RcoUGT101	Tandem
	Rf060222950	RcoUGT102	Tandem
	Rf060230540	RcoUGT103	Dispersed
	Rf070235790	RcoUGT104	WGD or Segmental
	Rf070236620	RcoUGT105	Tandem
	Rf070236640	RcoUGT106	Tandem
	Rf070236660	RcoUGT107	Tandem
	Rf070240440	RcoUGT108	Dispersed
	Rf070244670	RcoUGT109	Dispersed
	Rf070249910	RcoUGT110	Dispersed
	Rf070252470	RcoUGT111	Tandem
	Rf070252480	RcoUGT112	Tandem
	Rf070257730	RcoUGT113	Dispersed
	Rf070258350	RcoUGT114	WGD or Segmental
	Rf070258360	RcoUGT115	Tandem
	Rf070258370	RcoUGT116	Tandem
	Rf070258380	RcoUGT117	Tandem
	Rf070258390	RcoUGT118	Tandem
	Rf070258400	RcoUGT119	Tandem
	Rf070263730	RcoUGT120	Dispersed
	Rf070265990	RcoUGT121	Dispersed
R. idaeus	Rid.01g006260.m1	RidUGT1	Dispersed
	Rid.01g006400.m1	RidUGT2	Dispersed
	Rid.01g018440.m1	RidUGT3	WGD or Segmental
	Rid.01g018450.m1	RidUGT4	Tandem
	Rid.01g018470.m1	RidUGT5	Proximal
	Rid.01g019860.m1	RidUGT6	Tandem
	Rid.01g019870.m1	RidUGT7	Tandem
	Rid.01g019890.m1	RidUGT8	Tandem
	Rid.01g019900.m1	RidUGT9	Tandem
	Rid.01g019910.m1	RidUGT10	Tandem
	Rid.01g022780.m1	RidUGT11	WGD or Segmental
	Rid.01g025820.m1	RidUGT12	WGD or Segmental
	Rid.01g032090.m1	RidUGT13	Dispersed
	Rid.01g039120.m1	RidUGT14	Proximal
	Rid.01g039140.m1	RidUGT15	Tandem
	Rid.02g042350.m1	RidUGT16	Tandem
	Rid.02g044160.m1	RidUGT17	WGD or Segmental
	Rid.02g044210.m1	RidUGT18	Tandem
	Rid.02g044220.m1	RidUGT19	Tandem
	Rid.02g044720.m1	RidUGT20	Tandem
	Rid.02g044730.m1	RidUGT21	Tandem
	Rid.02g044740.m1	RidUGT22	Tandem
	Rid.02g044770.m1	RidUGT23	Tandem
	Rid.02g047510.m1	RidUGT24	WGD or Segmental
	Rid.02g047600.m1	RidUGT25	Proximal
	Rid.02g048940.m1	RidUGT26	Proximal
	Rid.02g048960.m1	RidUGT27	Proximal
	Rid.02g057330.m1	RidUGT28	Dispersed
	Rid.02g063330.m1	RidUGT29	Proximal
	Rid.02g063370.m1	RidUGT30	Proximal
	Rid.02g083090.m1	RidUGT31	Dispersed
	Rid.02g086850.m1	RidUGT32	WGD or Segmental
	Rid.03g094400.m1	RidUGT33	Proximal
	Rid.03g094420.m1	RidUGT34	Tandem
	Rid.03g094430.m1	RidUGT35	Tandem
	Rid.03g102050.m1	RidUGT36	Dispersed
	Rid.03g107110.m1	RidUGT37	Proximal
	Rid.03g107160.m1	RidUGT38	Tandem
	Rid.03g107170.m1	RidUGT39	Tandem
	Rid.03g109290.m1	RidUGT40	Dispersed
	Rid.03g110580.m1	RidUGT41	Dispersed
	Rid.03g121400.m1	RidUGT42	Dispersed
	Rid.03g126610.m1	RidUGT43	WGD or Segmental
	Rid.03g126640.m1	RidUGT44	Proximal
	Rid.03g127180.m1	RidUGT45	WGD or Segmental
	Rid.03g130320.m1	RidUGT46	WGD or Segmental
	Rid.03g136260.m1	RidUGT47	Proximal
	Rid.03g136310.m1	RidUGT48	Proximal
	Rid.03g137430.m1	RidUGT49	Dispersed
	Rid.03g138710.m1	RidUGT50	Tandem
	Rid.03g139780.m1	RidUGT51	Dispersed
	Rid.04g147100.m1	RidUGT52	Dispersed
	Rid.04g147780.m1	RidUGT53	WGD or Segmental
	Rid.04g152350.m1	RidUGT54	WGD or Segmental
	Rid.04g153570.m1	RidUGT55	WGD or Segmental
	Rid.04g170710.m1	RidUGT56	Proximal
	Rid.04g170750.m1	RidUGT57	Tandem
	Rid.04g170760.m1	RidUGT58	Tandem
	Rid.04g170780.m1	RidUGT59	Tandem
	Rid.04g170790.m1	RidUGT60	Tandem
	Rid.04g170810.m1	RidUGT61	Proximal
	Rid.04g170860.m1	RidUGT62	Proximal
	Rid.04g171520.m1	RidUGT63	Dispersed
	Rid.04g172050.m1	RidUGT64	Dispersed
	Rid.04g172480.m1	RidUGT65	Tandem
	Rid.04g172490.m1	RidUGT66	Tandem
	Rid.04g172820.m1	RidUGT67	Tandem
	Rid.04g172830.m1	RidUGT68	Tandem
	Rid.04g179080.m1	RidUGT69	Tandem
	Rid.04g179090.m1	RidUGT70	Tandem
	Rid.04g186170.m1	RidUGT71	Dispersed
	Rid.05g191670.m1	RidUGT72	Proximal
	Rid.05g191690.m1	RidUGT73	WGD or Segmental
	Rid.05g191700.m1	RidUGT74	Tandem
	Rid.05g191710.m1	RidUGT75	Tandem
	Rid.05g191720.m1	RidUGT76	Tandem
	Rid.05g191740.m1	RidUGT77	Proximal
	Rid.05g191840.m1	RidUGT78	Proximal
	Rid.05g194720.m1	RidUGT79	WGD or Segmental
	Rid.05g198270.m1	RidUGT80	Proximal
	Rid.05g198290.m1	RidUGT81	Proximal
	Rid.05g206510.m1	RidUGT82	Dispersed
	Rid.05g210290.m1	RidUGT83	Proximal
	Rid.05g212790.m1	RidUGT84	Tandem
	Rid.05g224130.m1	RidUGT85	WGD or Segmental
	Rid.05g224140.m1	RidUGT86	Tandem
	Rid.05g224270.m1	RidUGT87	Dispersed
	Rid.05g232150.m1	RidUGT88	WGD or Segmental
	Rid.05g232860.m1	RidUGT89	WGD or Segmental
	Rid.05g234950.m1	RidUGT90	WGD or Segmental
	Rid.06g243010.m1	RidUGT91	Dispersed
	Rid.06g249580.m1	RidUGT92	Proximal
	Rid.06g249600.m1	RidUGT93	Proximal
	Rid.06g253340.m1	RidUGT94	WGD or Segmental
	Rid.06g253360.m1	RidUGT95	Tandem
	Rid.06g254240.m1	RidUGT96	Tandem
	Rid.06g254250.m1	RidUGT97	Tandem
	Rid.06g254260.m1	RidUGT98	Tandem
	Rid.06g263300.m1	RidUGT99	Dispersed
	Rid.06g283540.m1	RidUGT100	Tandem
	Rid.06g283550.m1	RidUGT101	Tandem
	Rid.06g283560.m1	RidUGT102	Tandem
	Rid.06g283800.m1	RidUGT103	Dispersed
	Rid.06g283910.m1	RidUGT104	Proximal
	Rid.06g283930.m1	RidUGT105	Tandem
	Rid.06g283940.m1	RidUGT106	Tandem
	Rid.06g283950.m1	RidUGT107	Tandem
	Rid.06g283960.m1	RidUGT108	Tandem
	Rid.06g283990.m1	RidUGT109	Tandem
	Rid.06g284000.m1	RidUGT110	Tandem
	Rid.06g284010.m1	RidUGT111	Tandem
	Rid.06g284040.m1	RidUGT112	Tandem
	Rid.06g291310.m1	RidUGT113	WGD or Segmental
	Rid.06g291790.m1	RidUGT114	Tandem
	Rid.06g294370.m1	RidUGT115	Dispersed
	Rid.07g301460.m1	RidUGT116	Tandem
	Rid.07g308440.m1	RidUGT117	Proximal
	Rid.07g308460.m1	RidUGT118	Tandem
	Rid.07g308470.m1	RidUGT119	Tandem
	Rid.07g308480.m1	RidUGT120	Tandem
	Rid.07g309260.m1	RidUGT121	Dispersed
	Rid.07g316120.m1	RidUGT122	Proximal
	Rid.07g316170.m1	RidUGT123	Proximal
	Rid.07g319680.m1	RidUGT124	Dispersed
	Rid.07g323130.m1	RidUGT125	Dispersed
	Rid.07g323260.m1	RidUGT126	Dispersed
	Rid.07g340830.m1	RidUGT127	Proximal
	Rid.07g340850.m1	RidUGT128	Tandem
	Rid.07g340860.m1	RidUGT129	Tandem
	Rid.07g341880.m1	RidUGT130	Tandem
R. occidentalis	Ro01_G00985	RocUGT1	WGD or Segmental
	Ro01_G04167	RocUGT2	WGD or Segmental
	Ro01_G15230	RocUGT3	Tandem
	Ro01_G29465	RocUGT4	Tandem
	Ro01_G29466	RocUGT5	Tandem
	Ro01_G29468	RocUGT6	Proximal
	Ro01_G29827	RocUGT7	Tandem
	Ro01_G29828	RocUGT8	Tandem
	Ro01_G29865	RocUGT9	Proximal
	Ro01_G29867	RocUGT10	Tandem
	Ro01_G29868	RocUGT11	Tandem
	Ro01_G29869	RocUGT12	WGD or Segmental
	Ro01_G30110	RocUGT13	Dispersed
	Ro02_G00774	RocUGT14	Dispersed
	Ro02_G02402	RocUGT15	WGD or Segmental
	Ro02_G05481	RocUGT16	WGD or Segmental
	Ro02_G21471	RocUGT17	Tandem
	Ro02_G22005	RocUGT18	Proximal
	Ro02_G27972	RocUGT19	Dispersed
	Ro02_G35242	RocUGT20	Tandem
	Ro02_G35243	RocUGT21	Tandem
	Ro02_G35244	RocUGT22	Tandem
	Ro02_G35838	RocUGT23	Dispersed
	Ro02_G35954	RocUGT24	Tandem
	Ro02_G35955	RocUGT25	Tandem
	Ro02_G35960	RocUGT26	Tandem
	Ro02_G35961	RocUGT27	Tandem
	Ro02_G35963	RocUGT28	Proximal
	Ro02_G35964	RocUGT29	Tandem
	Ro02_G35966	RocUGT30	Tandem
	Ro02_G35994	RocUGT31	Proximal
	Ro02_G35996	RocUGT32	Tandem
	Ro02_G35999	RocUGT33	Proximal
	Ro03_G05827	RocUGT34	Dispersed
	Ro03_G14530	RocUGT35	Dispersed
	Ro03_G31868	RocUGT36	Tandem
	Ro03_G31883	RocUGT37	Tandem
	Ro03_G31886	RocUGT38	Tandem
	Ro03_G31887	RocUGT39	Tandem
	Ro03_G31950	RocUGT40	Tandem
	Ro03_G31951	RocUGT41	Proximal
	Ro03_G31953	RocUGT42	Tandem
	Ro03_G32113	RocUGT43	WGD or Segmental
	Ro03_G32215	RocUGT44	Proximal
	Ro03_G32216	RocUGT45	Proximal
	Ro03_G32822	RocUGT46	Tandem
	Ro03_G32823	RocUGT47	Tandem
	Ro03_G32839	RocUGT48	Proximal
	Ro03_G32841	RocUGT49	Proximal
	Ro04_G13298	RocUGT50	Dispersed
	Ro04_G15150	RocUGT51	WGD or Segmental
	Ro04_G36125	RocUGT52	Dispersed
	Ro04_G36189	RocUGT53	Tandem
	Ro04_G36191	RocUGT54	WGD or Segmental
	Ro04_G36623	RocUGT55	Tandem
	Ro04_G36624	RocUGT56	Tandem
	Ro04_G36884	RocUGT57	Tandem
	Ro04_G36885	RocUGT58	Tandem
	Ro04_G37012	RocUGT59	Dispersed
	Ro04_G37231	RocUGT60	Dispersed
	Ro05_G03386	RocUGT61	WGD or Segmental
	Ro05_G09341	RocUGT62	Tandem
	Ro05_G13824	RocUGT63	Dispersed
	Ro05_G25325	RocUGT64	Dispersed
	Ro05_G30511	RocUGT65	Dispersed
	Ro05_G30544	RocUGT66	WGD or Segmental
	Ro05_G30704	RocUGT67	Dispersed
	Ro05_G30707	RocUGT68	WGD or Segmental
	Ro05_G31064	RocUGT69	Dispersed
	Ro05_G31485	RocUGT70	Proximal
	Ro05_G31486	RocUGT71	Proximal
	Ro05_G31669	RocUGT72	Tandem
	Ro05_G31671	RocUGT73	WGD or Segmental
	Ro05_G31675	RocUGT74	Tandem
	Ro05_G31676	RocUGT75	Tandem
	Ro05_G31680	RocUGT76	Tandem
	Ro06_G08192	RocUGT77	Dispersed
	Ro06_G08419	RocUGT78	Tandem
	Ro06_G08420	RocUGT79	Tandem
	Ro06_G08436	RocUGT80	Dispersed
	Ro06_G08444	RocUGT81	Tandem
	Ro06_G09752	RocUGT82	Dispersed
	Ro06_G09861	RocUGT83	Dispersed
	Ro06_G14355	RocUGT84	Dispersed
	Ro06_G17652	RocUGT85	Dispersed
	Ro06_G18337	RocUGT86	WGD or Segmental
	Ro06_G20165	RocUGT87	Proximal
	Ro06_G23501	RocUGT88	Tandem
	Ro06_G28556	RocUGT89	Tandem
	Ro06_G28557	RocUGT90	Tandem
	Ro06_G28558	RocUGT91	Tandem
	Ro06_G28559	RocUGT92	Tandem
	Ro06_G28560	RocUGT93	Tandem
	Ro06_G28561	RocUGT94	Tandem
	Ro06_G28562	RocUGT95	Tandem
	Ro06_G28668	RocUGT96	WGD or Segmental
	Ro06_G28669	RocUGT97	Tandem
	Ro06_G28672	RocUGT98	WGD or Segmental
	Ro06_G29056	RocUGT99	WGD or Segmental
	Ro06_G29057	RocUGT100	Tandem
	Ro06_G29065	RocUGT101	Tandem
	Ro06_G29078	RocUGT102	Tandem
	Ro06_G29079	RocUGT103	Proximal
	Ro06_G29080	RocUGT104	Tandem
	Ro06_G29081	RocUGT105	Tandem
	Ro07_G04358	RocUGT106	Tandem
	Ro07_G08977	RocUGT107	Dispersed
	Ro07_G18091	RocUGT108	WGD or Segmental
	Ro07_G23936	RocUGT109	Dispersed
	Ro07_G33284	RocUGT110	WGD or Segmental
	Ro07_G33285	RocUGT111	Tandem
	Ro07_G33309	RocUGT112	Tandem
	Ro07_G33310	RocUGT113	Tandem
	Ro07_G33311	RocUGT114	Tandem
	Ro07_G33315	RocUGT115	Tandem
	Ro07_G34554	RocUGT116	WGD or Segmental
	Ro07_G34555	RocUGT117	Tandem
	Ro07_G34556	RocUGT118	Tandem
	Ro07_G34561	RocUGT119	Tandem
	Ro07_G34562	RocUGT120	Tandem
	Ro07_G34696	RocUGT121	Dispersed

## Sheet: Table S4
Table S4 Evolutionary selection and differentiation time of UGTs Gene in Rubus
Species	Pair		Ka	Ks	Ka/ks	MYA	Note
R. chingii	RchUGT22	RchUGT25	0.000984414	NaN	NaN	NaN	High Sequence Divergence Value (pS>=0.75)
	RchUGT47	RchUGT131	0.449743	1.75729	0.255929	58.5764
	RchUGT67	RchUGT144	0.312634	1.84042	0.169871	61.3473
	RchUGT91	RchUGT113	0.420302	1.40728	0.298662	46.9094
	RchUGT90	RchUGT152	0.367789	1.49749	0.245604	49.9162
	RchUGT101	RchUGT154	0.360069	2.16627	0.166216	72.209
	RchUGT93	RchUGT167	0.36562	1.86103	0.196461	62.0345
R. corchorifolius	RcoUGT85	RcoUGT46	0.463263	1.75902	0.263364	58.6339
	RcoUGT76	RcoUGT72	0.44891	1.68354	0.266647	56.1179
	RcoUGT74	RcoUGT60	0.358157	1.52344	0.235098	50.7812
	RcoUGT70	RcoUGT104	0.328771	1.52601	0.215445	50.867
	RcoUGT14	RcoUGT8	0.56753	NaN	NaN	NaN	High Sequence Divergence Value (pS>=0.75)
	RcoUGT31	RcoUGT9	0.502789	1.51712	0.331409	50.5708
	RcoUGT100	RcoUGT114	0.591963	NaN	NaN	NaN	High Sequence Divergence Value (pS>=0.75)
	RcoUGT35	RcoUGT114	0.337037	NaN	NaN	NaN	High Sequence Divergence Value (pS>=0.75)
R. idaeus	RidUGT11	RidUGT17	0.575776	2.79672	0.205875	93.2241
	RidUGT12	RidUGT32	0.477528	1.44987	0.32936	48.329
	RidUGT3	RidUGT73	0.327452	NaN	NaN	NaN	High Sequence Divergence Value (pS>=0.75)
	RidUGT43	RidUGT45	0.018828	0.0779702	0.241477	2.59901
	RidUGT46	RidUGT94	0.273432	1.90616	0.143446	63.5388
	RidUGT89	RidUGT113	0.486256	NaN	NaN	NaN	High Sequence Divergence Value (pS>=0.75)
R. occidentalis	RocUGT2	RocUGT16	0.527422	1.76176	0.299372	58.7253
	RocUGT1	RocUGT15	0.471045	1.49931	0.314174	49.977
	RocUGT12	RocUGT73	0.325135	NaN	NaN	NaN	High Sequence Divergence Value (pS>=0.75)
	RocUGT43	RocUGT99	0.261851	1.88119	0.139194	62.7065
	RocUGT54	RocUGT61	0.414726	1.33913	0.309699	44.6376
	RocUGT51	RocUGT98	0.426452	1.48456	0.287258	49.4855
	RocUGT66	RocUGT96	0.446218	4.15459	0.107404	138.486
	RocUGT68	RocUGT110	0.327015	1.36203	0.240093	45.4011
	RocUGT86	RocUGT98	0.0521371	0.0886693	0.587995	2.95564

## Sheet: Table S5
Table S5 Homologous genes and functional description of raspberry and Arabidopsis thaliana
Sequence ID	Gene Name	BLAST in Arabidopsis	Gene Name in Arabidopsis	Description
LG03.4688	RchUGT68	AT1G07260	UGT71C3	UDP-glycosyltransferase 71C3; Possesses low quercetin 3-O-glucosyltransferase activity in vitro.
LG06.321	RchUGT139	AT1G10400	UGT90A2	UDP-glycosyltransferase 90A2; Belongs to the UDP-glycosyltransferase family.
LG05.4061	RchUGT108	AT1G22360	UGT85A2	UDP-glycosyltransferase 85A2; Belongs to the UDP-glycosyltransferase family.
LG04.213	RchUGT78	AT1G24100	UGT74B1	UDP-glycosyltransferase 74B1; Involved in the biosynthesis of glucosinolate. In in vitro assay, may use phenylacetothiohydroximate (PATH), but not phenylacetic acid (PAA), indole-3-acetic acid (IAA) or salicylic acid (SA) as substrate. Specific for the thiohydroximate functional group and does not glucosylate the carboxylate group or a hydroxyl group.
LG05.460	RchUGT113	AT1G73880	UGT89B1	Flavonol 3-O-glucosyltransferase UGT89B1; Possesses quercetin 3-O-glucosyltransferase, 7-O- glucosyltransferase and 4'-O-glucosyltransferase activities in vitro. Also active in vitro on benzoates and benzoate derivatives.
LG01.2404	RchUGT11	AT2G18570	UGT72D1	UDP-glycosyltransferase 72D1; Belongs to the UDP-glycosyltransferase family.
LG01.1902	RchUGT8	AT2G22590	UGT91A1	UDP-glycosyltransferase 91A1; Belongs to the UDP-glycosyltransferase family.
LG01.2143	RchUGT10	AT2G23250	UGT84B2	UDP-glycosyltransferase 84B2; Belongs to the UDP-glycosyltransferase family.
LG03.4807	RchUGT70	AT2G30140	UGT87A2	UDP-glycosyltransferase 87A2.
LG06.4022	RchUGT143	AT2G36780	UGT73C3	UDP-glycosyltransferase 73C3; Belongs to the UDP-glycosyltransferase family.
LG06.4101	RchUGT148	AT2G36970	UGT86A1	UDP-glycosyltransferase 86A1; Belongs to the UDP-glycosyltransferase family.
LG01.3564	RchUGT14	AT2G43820	UGT74F2	UDP-glycosyltransferase 74F2; Glycosyltransferase that glucosylates benzoic acid and derivatives. Substrate preference is benzoic acid > salicylic acid (SA) > 3-hydroxybenzoic acid > 4-hydroxybenzoic acid. Catalyzes the formation of both SA 2-O-beta-D-glucoside (SAG) and SA glucose ester (SGE). Has high affinity for the tryptophan precursor anthranilate. Catalyzes the formation of anthranilate gl…
LG06.598	RchUGT156	AT3G02100	UGT83A1	UDP-glycosyltransferase 83A1; Belongs to the UDP-glycosyltransferase family.
LG07.297	RchUGT163	AT3G16520	UGT88A1	UDP-glycosyltransferase 88A1; Possesses low quercetin 3-O-glucosyltransferase, 7-O- glucosyltransferase, 3'-O-glucosyltransferase and 4'-O- glucosyltransferase activities in vitro; Belongs to the UDP-glycosyltransferase family.
LG06.1275	RchUGT131	AT3G21760	UGT71B2	UDP-glycosyltransferase 71B2; Glucosyltransferase that glucosylates the cell wall inhibitor hypostatin in vivo to form a bioactive glucoside. Belongs to the UDP-glycosyltransferase family.
LG07.1698	RchUGT159	AT3G21780	UGT71B6	UDP-glycosyltransferase 71B6; Glucosyltransferase that glucosylates the (+) enantiomer of abscisic acid ((+)-ABA). Is not active on structural analogs with alterations to the 8'- and 9'- methyl groups. Belongs to the UDP-glycosyltransferase family.
LG06.4016	RchUGT140	AT3G53150	UGT73D1	UDP-glycosyltransferase 73D1; Belongs to the UDP-glycosyltransferase family.
LG07.1014	RchUGT157	AT3G55530	SDIR1	E3 ubiquitin-protein ligase SDIR1; E3 ubiquitin-protein ligase that acts as a positive regulator of abscisic acid-related stress signal transduction. Interacts with and ubiquitinates ATP1/SDIRIP1 to modulate ATP1/SDIRIP1 stability through the 26S proteasome pathway. Regulates abscisic acid (ABA) and salt stress responses by negatively affecting ATP1/SDIRIP1 stability. The SDIR1-ATP1/SDIRIP1 compl…
LG07.944	RchUGT172	AT3G55700	UGT76F1	UDP-glycosyltransferase 76F1; Belongs to the UDP-glycosyltransferase family.
LG07.4009	RchUGT168	AT4G01070	UGT72B1	UDP-glycosyltransferase 72B1; Bifunctional O-glycosyltransferase and N-glycosyltransferase that can detoxify xenobiotics. Possesses high activity to metabolize the persistent pollutants 2,4,5-trichlorophenol (TCP) and 3,4- dichloroaniline (DCA). Also active on benzoates and benzoate derivatives in vitro.
LG02.4273	RchUGT36	AT4G15480	UGT84A1	UDP-glycosyltransferase 84A1; UDP-glucosyltransferase that forms glucose esters with phenylpropanoids. Glucosylates 4- coumarate, ferulate, caffeate, sinapate and cinnamate. Can glucosylate the phytotoxic xenobiotic compound 2,4,5-trichlorophenol (TCP). Belongs to the UDP-glycosyltransferase family.
LG04.2301	RchUGT81	AT4G15550	UGT75D1	UDP-glycosyltransferase 75D1; Glucosyltransferase that glucosylates kaempferol. Can glucosylate the phytotoxic xenobiotic compound 2,4,5-trichlorophenol (TCP).
LG02.4205	RchUGT32	AT4G34131	UGT73B3	UDP-glycosyltransferase 73B3; Possesses quercetin 3-O-glucosyltransferase activity in vitro. Also active in vitro on benzoates and benzoate derivatives. Involved in stress or defense responses.
LG04.742	RchUGT91	AT5G03490	UGT89A2	UDP-glycosyltransferase 89A2; Glucosyltransferase that glucosylates benzoates and benzoate derivatives in vitro.
LG04.2614	RchUGT86	AT5G12890	UGT92A1	UDP-glycosyltransferase 92A1; Belongs to the UDP-glycosyltransferase family.
LG07.63	RchUGT169	AT5G17050	UGT78D2	Flavonol 3-O-glucosyltransferase; Flavonol 3-O-glucosyltransferase that catalyzes the transfer of glucose from UDP-glucose to the 3-OH position of quercetin and kaempferol. Possesses high quercetin 3-O-glucosyltransferase activity in vitro. Catalyzes the glycosylation of anthocyanins from UDP-glucose. Also active in vitro on benzoates and benzoate derivatives. Belongs to the UDP-glycosyltransfera…
LG05.3832	RchUGT100	AT5G49690	UGT91C1	UDP-glycosyltransferase 91C1; Belongs to the UDP-glycosyltransferase family.
LG03.1998	RchUGT63	AT5G54010	UGT79B6	UDP-glycosyltransferase 79B6; Belongs to the UDP-glycosyltransferase family.

## Sheet: Table S6 
Table S6 The 58 known UGTs genes with flavonoids as substrate receptors
Organism name	Protein name	Sequence id	Uniprot ID
Actinidia chinensis var. chinensis	Cyanidin 3-O-galactoside 2''-O-xylosyltransferase	AcFGGT1	A0A2R6QXF8
Actinidia chinensis var. chinensis	Anthocyanidin 3-O-galactosyltransferase	AcF3GTT	A0A2R6Q8R5
Allium cepa	Flavonoid glucosyl-transferase	AcUGT73J1	Q7XJ49
Antirrhinum majus	Chalcone 4'-O-glucosyltransferase	Am4'CGT	Q33DV3
Arabidopsis thaliana	Flavonol 3-O-glucosyltransferase	AtUGT71C1	O82381
Arabidopsis thaliana	Flavonol 3-O-glucosyltransferase	AtUGT71C4	Q9LML6
Arabidopsis thaliana	Flavonol 3-O-glucosyltransferase	AtUGT71D1	O82383
Arabidopsis thaliana	Flavonol 3-O-glucosyltransferase	AtUGT71B1	Q9LSY9
Arabidopsis thaliana	Flavonol 7-O-beta-glucosyltransferase	AtUGT74F1	O22820
Arabidopsis thaliana	UDP-glycosyltransferase 76F1	AtUGT76F1	Q9M052
Arabidopsis thaliana	Flavonol-3-O-rhamnosyltransferase	AtUGT78D1	Q9S9P6
Arabidopsis thaliana	Flavonol 3-O-glucosyltransferase	AtUGT78D2	Q9LFJ8
Arabidopsis thaliana	Flavonol 3-O-glucosyltransferase	AtUGT89B1	Q9C9B0
Arabidopsis thaliana	Flavonol 7-O-rhamnosyltransferase	AtUGT89C1	Q9LNE6
Bellis perennis	Cyanidin-3-O-glucoside 2-O-glucuronosyltransferase	BpUGAT	Q5NTH0
Citrus maxima	Flavanone 7-O-glucoside 2''-O-beta-L-rhamnosyltransferase	C12RT1	Q8GVE3
Clitoria ternatea	UDP-glucose:anthocyanin 3',5'-O-glucosyltransferase	Ct3'5'GT	A4F1Q6
Crocosmia x crocosmiiflora	Myricetin 3-O-rhamnosyltransferase	CcUGT77B2	A0A2Z5CVA1
Crocosmia x crocosmiiflora	Myricetin 3-O-rhamnoside 1,2-glucosyltransferase	CcUGT709G2	A0A2Z5CV93
Dianthus caryophyllus	UDP-glucose:flavonoid 3-O-glucosyltransferase	DicGT1	Q60FF2
Eustoma grandiflorum	Flavonoid 3-O-galactosyltransferase	Eg3GalT	A4F1Q1
Forsythia intermedia	Flavonoid 3-O-glucosyltransferase	FiUFGT	Q9XF16
Fragaria × ananassa	UDP-glycosyltransferase 71K3	FaUGT71K3	P0DO49
Fragaria ananassa	UDP-glucose flavonoid 3-O-glucosyltransferase 6	FaGT6	Q2V6K0
Fragaria ananassa	UDP-glucose flavonoid 3-O-glucosyltransferase 7	FaGT7	Q2V6J9
Garcinia mangostana	UDP-glycose flavonoid 3-O-glycosyltransferase	GmUFGT	B9UZ54
Gentiana triflora	Anthocyanidin 3-O-glucoside 5-O-glucosyltransferase	Gt5GT7	B2NID7
Gentiana triflora	Anthocyanidin 3-O-glucosyltransferase	GtA3GT	Q96493
Gentiana triflora	Anthocyanin 3'-O-beta-glucosyltransferase	Gt3'GT	Q8H0F2
Ginkgo biloba	UDP-glycosyltransferase 716A1	GbUGT716A1	A0A2Z2PBJ1
Glycine max	Flavonol 3-O-glucoside/galactoside (1->2) glucosyltransferase	GmF3G2''GT	A0A0G4DBR5
Hieracium pilosella	UDP-glycosyltransferase 90A7	HpYGT90A7	ACB56926.1*
Hordeum vulgare	Anthocyanidin 3-O-glucosyltransferase	HvBZ1	P14726
Ipomoea nil	Anthocyanidin 3-O glucoside 2"-O-glucosyltransferase	In3GGT	Q53UH4
Ipomoea purpurea	Anthocyanidin 3-O glucoside 2"-O-glucosyltransferase	Ip3GGT	Q53UH5
Iris hollandica	Anthocyanidin 3-O-glucosyltransferase	Ih3GT	Q5KTF3
Iris hollandica	Cyanidin 3-O-rutinoside 5-O-glucosyltransferase	Ih5GT	Q767C8
Lobelia erinus	UDP-glucose:anthocyanidin 3-O-glucosyltransferase	Le3GT-A	A4F1S9
Malus domestica	UDP-glycosyltransferase 88F6	MdUGT88F6	AGS78119.1*
Manihot esculenta	Anthocyanidin 3-O-glucosyltransferase 1	MeGT1	Q40284
Medicago truncatula	Flavonoid 3-O-glucosyltransferase	MtUGT78G1	A6XNC6
Medicago truncatula	UDP-glycosyltransferase 85H2	MtUGT85H2	ABI94024.1*
Perilla frutescens	Anthocyanidin 3-O-glucoside 5-O-glucosyltransferase 1	Pf3R4	Q9ZR27
Petunia hybrida	Anthocyanidin 3-O-glucosyltransferase	PhRT	Q43716
Petunia hybrida	Kaempferol 3-O beta-D-galactosyltransferase	PhF3GalT	Q9SBQ8
Punica granatum	UDP-glycosyltransferase 95B2	PgUGT95B2	A0A3G6VDW1
Rosa hybrid cultivar	UDP-glucose: anthocyanin 3-glucosylltransferase	RhA3GT	A8CDW6
Rosa hybrid cultivar	UDP-glucose: flavonol 3-O-glucosyltransferase	RhGT4	Q2PGW4
Rosa hybrid cultivar	UDP-glucose:flavonol 3-glucosyltransferase	RhF3GT	A8CDW8
Rosa hybrid cultivar	Anthocyanidin 5,3-O-glucosyltransferase	RhGT1	Q4R1I9
Scutellaria baicalensis	Flavonoid 7-O-glucuronosyltransferase	SbUGT88D1	B9A9D5
Solanum melongena	Anthocyanidin 3-O-glucosyltransferase	SmGT	Q43641
Verbena hybrida	Anthocyanidin 3-O-glucoside 5-O-glucosyltransferase	VhGT8	Q9ZR25
Veronica persica	UDP-glycosyltransferase 88D8	VpUGT88D8	C0STS8
Vigna mungo	Flavonoid 3-O-galactosyl transferase	VmUF3GaT	Q9ZWS2
Vitis vinifera	Anthocyanidin 3-O-glucosyltransferase	VvUFGT	P51094
Zea mays	Anthocyanidin 3-O-glucosyltransferase	ZmBZ1	P16166
Zea mays	UDP-glycosyltransferase 708A6	ZmUGT708A6	A0A096SRM5

## Sheet: Table S7
Table S7 Screening of RchUGTs related to flavonoid UGT Glycosylation based on phylogenetic Tree
Sequence ID	Gene Name	CLASS	GROUP
LG01.1780	RchUGT1	P
LG01.1781	RchUGT2	P
LG01.1783	RchUGT3	P
LG01.1784	RchUGT4	P
LG01.1785	RchUGT5	P
LG01.1786	RchUGT6	P
LG01.1899	RchUGT7	A
LG01.1902	RchUGT8	A
LG01.1904	RchUGT9	A
LG01.2143	RchUGT10	L
LG01.2404	RchUGT11	E
LG01.2406	RchUGT12	E
LG01.2952	RchUGT13	A
LG01.3564	RchUGT14	L	OG14,5GT
LG01.3565	RchUGT15	L	OG14,5GT
LG02.116	RchUGT16	E
LG02.2191	RchUGT17	L
LG02.2192	RchUGT18	L
LG02.2193	RchUGT19	L
LG02.2194	RchUGT20	L
LG02.2195	RchUGT21	L
LG02.2651	RchUGT22	E
LG02.2654	RchUGT23	E
LG02.2782	RchUGT24	F	OG23,3GT
LG02.2918	RchUGT25	E
LG02.3339	RchUGT26	E	OG7
LG02.3505	RchUGT27	A	OG8,GGT
LG02.3921	RchUGT28	L
LG02.4196	RchUGT29	D	OG1
LG02.4199	RchUGT30	D	OG1
LG02.4204	RchUGT31	D	OG1
LG02.4205	RchUGT32	D	OG1
LG02.4206	RchUGT33	D	OG1
LG02.4207	RchUGT34	D	OG1
LG02.4211	RchUGT35	D	OG1
LG02.4273	RchUGT36	L
LG02.4444	RchUGT37	L
LG02.4445	RchUGT38	L
LG02.4448	RchUGT39	L
LG02.4449	RchUGT40	L
LG02.4450	RchUGT41	L
LG02.4451	RchUGT42	L
LG02.4452	RchUGT43	L
LG02.4453	RchUGT44	L
LG02.4454	RchUGT45	L
LG02.460	RchUGT46	C	OG1
LG03.1225	RchUGT47	E	OG7
LG03.1773	RchUGT48	O
LG03.1774	RchUGT49	O
LG03.1775	RchUGT50	O
LG03.1776	RchUGT51	O
LG03.1778	RchUGT52	O
LG03.1779	RchUGT53	O
LG03.1780	RchUGT54	O
LG03.1781	RchUGT55	O
LG03.1782	RchUGT56	O
LG03.1783	RchUGT57	O
LG03.1784	RchUGT58	O
LG03.1785	RchUGT59	O
LG03.1786	RchUGT60	O
LG03.1787	RchUGT61	O
LG03.1788	RchUGT62	O
LG03.1998	RchUGT63	A	OG8,GGT
LG03.2108	RchUGT64	K
LG03.3373	RchUGT65	D	OG1
LG03.3569	RchUGT66	P
LG03.4144	RchUGT67	K
LG03.4688	RchUGT68	E	OG7
LG03.4806	RchUGT69	J
LG03.4807	RchUGT70	J
LG03.4917	RchUGT71	E
LG03.569	RchUGT72	A	OG8,GGT
LG03.570	RchUGT73	A	OG8,GGT
LG03.571	RchUGT74	A	OG8,GGT
LG04.150	RchUGT75	P
LG04.211	RchUGT76	L
LG04.212	RchUGT77	L
LG04.213	RchUGT78	L
LG04.214	RchUGT79	L
LG04.2298	RchUGT80	L	OG14,5GT
LG04.2301	RchUGT81	L	OG14,5GT
LG04.2531	RchUGT82	L
LG04.2535	RchUGT83	L
LG04.2567	RchUGT84	L
LG04.2568	RchUGT85	L
LG04.2614	RchUGT86	B	OG1
LG04.3361	RchUGT87	F	OG23,3GT
LG04.3957	RchUGT88	F	OG23,3GT
LG04.3958	RchUGT89	F	OG23,3GT
LG04.612	RchUGT90	Q	708A6
LG04.742	RchUGT91	B	OG1
LG04.743	RchUGT92	B	OG1
LG05.1154	RchUGT93	E
LG05.2170	RchUGT94	R	95B2
LG05.2171	RchUGT95	R	95B2
LG05.2375	RchUGT96	L
LG05.2662	RchUGT97	A	OG8,GGT
LG05.3444	RchUGT98	E	OG7
LG05.3446	RchUGT99	E	OG7
LG05.3832	RchUGT100	A
LG05.389	RchUGT101	I
LG05.4049	RchUGT102	G	85H2
LG05.4050	RchUGT103	G	85H2
LG05.4051	RchUGT104	G	85H2
LG05.4058	RchUGT105	G	85H2
LG05.4059	RchUGT106	G	85H2
LG05.4060	RchUGT107	G	85H2
LG05.4061	RchUGT108	G	85H2
LG05.4062	RchUGT109	G	85H2
LG05.4066	RchUGT110	G	85H2
LG05.4067	RchUGT111	G	85H2
LG05.4068	RchUGT112	G	85H2
LG05.460	RchUGT113	B	OG1
LG06.1224	RchUGT114	O
LG06.1225	RchUGT115	O
LG06.1226	RchUGT116	O
LG06.1227	RchUGT117	O
LG06.1228	RchUGT118	O
LG06.1234	RchUGT119	O
LG06.1235	RchUGT120	O
LG06.1236	RchUGT121	O
LG06.1237	RchUGT122	O
LG06.1238	RchUGT123	O
LG06.1239	RchUGT124	O
LG06.1240	RchUGT125	O
LG06.1241	RchUGT126	O
LG06.1242	RchUGT127	O
LG06.1243	RchUGT128	O
LG06.1244	RchUGT129	O
LG06.1245	RchUGT130	O
LG06.1275	RchUGT131	E	OG7
LG06.1276	RchUGT132	E	OG7
LG06.1277	RchUGT133	E	OG7
LG06.1278	RchUGT134	E	OG7
LG06.1279	RchUGT135	E	OG7
LG06.1281	RchUGT136	E	OG7
LG06.1284	RchUGT137	E	OG7
LG06.3172	RchUGT138	Q	708A6
LG06.321	RchUGT139	C	OG1
LG06.4016	RchUGT140	D	OG1
LG06.4018	RchUGT141	D	OG1
LG06.4021	RchUGT142	D	OG1
LG06.4022	RchUGT143	D	OG1
LG06.4094	RchUGT144	K
LG06.4098	RchUGT145	K
LG06.4099	RchUGT146	K
LG06.4100	RchUGT147	K
LG06.4101	RchUGT148	K
LG06.4454	RchUGT149	H	76F1
LG06.4457	RchUGT150	H	76F1
LG06.5198	RchUGT151	A	OG8,GGT
LG06.556	RchUGT152	Q	708A6
LG06.557	RchUGT153	Q	708A6
LG06.596	RchUGT154	I
LG06.597	RchUGT155	I
LG06.598	RchUGT156	I
LG07.1014	RchUGT157	L	OG14,5GT
LG07.1697	RchUGT158	E	OG7
LG07.1698	RchUGT159	E	OG7
LG07.1907	RchUGT160	A
LG07.2066	RchUGT161	J
LG07.2926	RchUGT162	R	95B2
LG07.297	RchUGT163	E	OG7
LG07.3505	RchUGT164	I
LG07.3915	RchUGT165	A
LG07.3917	RchUGT166	A
LG07.4008	RchUGT167	E
LG07.4009	RchUGT168	E
LG07.63	RchUGT169	F	OG23,3GT
LG07.942	RchUGT170	H	76F1
LG07.943	RchUGT171	H	76F1
LG07.944	RchUGT172	H	76F1
